# Supplementary material for: Trans-biobank Mendelian randomization analyses identify opposing pathways in plasma low-density lipoprotein-cholesterol lowering and gallstone disease
Source: bioRxiv or medRxiv preprint supplement (doi:10.1101/2023.09.27.23296205), 2023-09-27
Supplement: Supplementary file [file media-1.pdf]

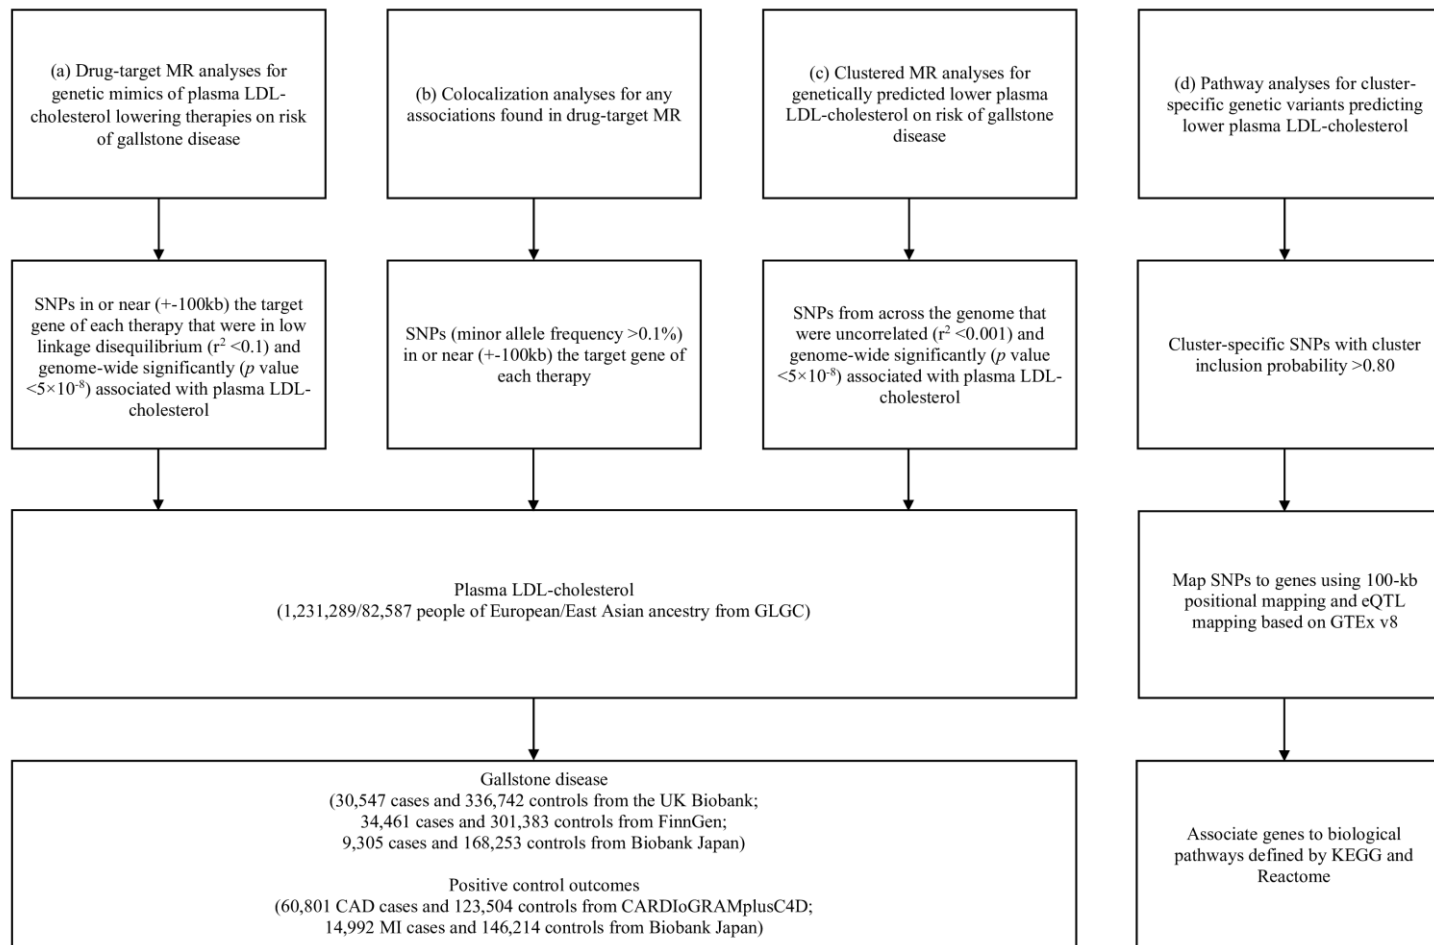

Supplemental Figure 1. Flowchart of the study design.

CAD, coronary artery disease; CARDIoGRAMplusC4D, Coronary ARtery DIsease Genome wide Replication and Meta-analysis plus The Coronary Artery Disease Genetics; eQTL, expression quantitative trait locus; GLGC, Global Lipids Genetics Consortium; LDL, low-density lipoprotein; MI, myocardial infarction; MR, Mendelian randomization.

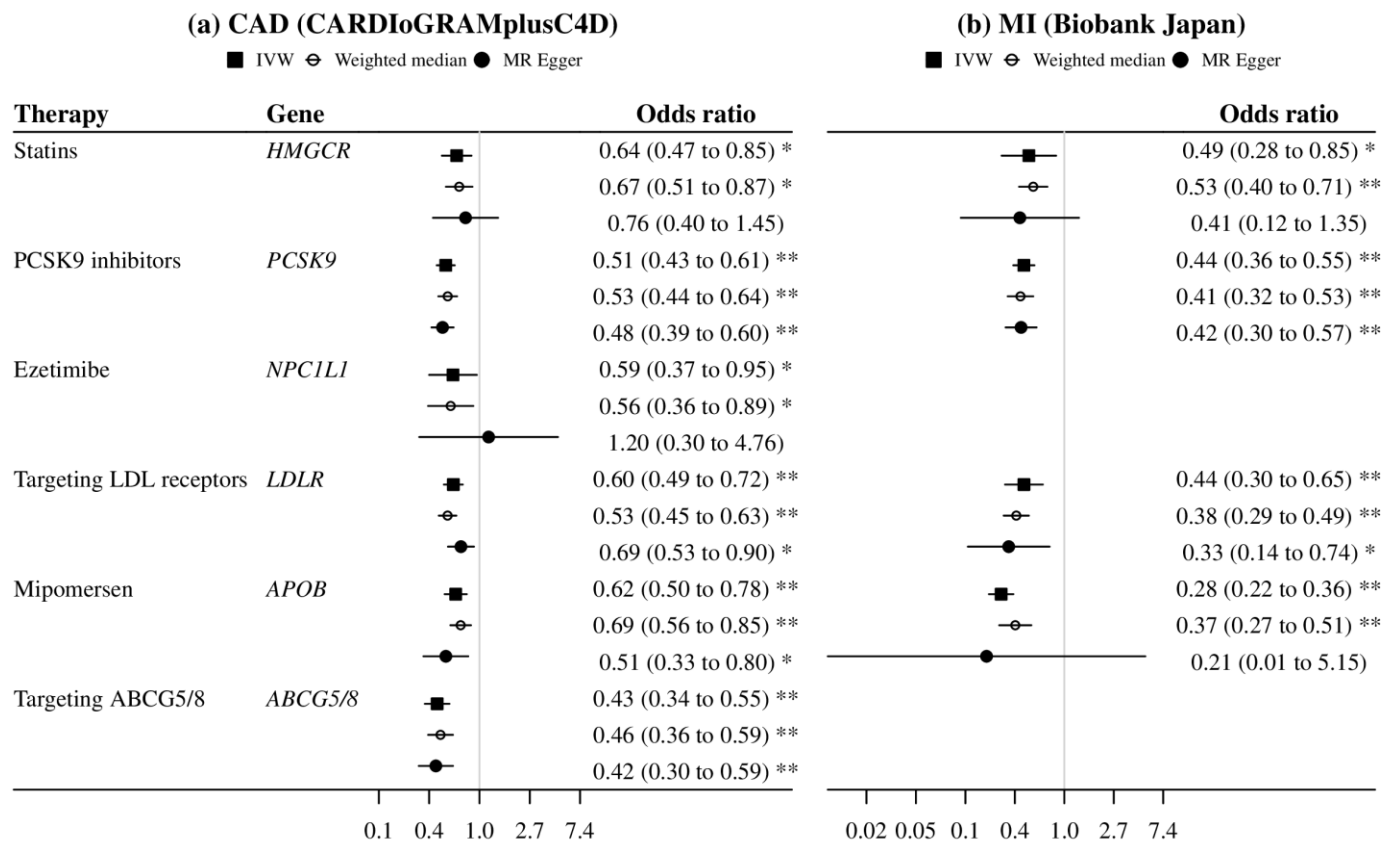

Supplemental Figure 2. Mendelian randomization estimates for genetic mimics of plasma LDL-cholesterol lowering therapies on risk of CAD and MI.

ABCG5/8, adenosine triphosphate (ATP)-binding cassette transporters G5/8; CAD, coronary artery disease; CARDIoGRAMplusC4D, Coronary ARtery Disease Genome wide Replication and Meta-analysis plus The Coronary Artery Disease Genetics; IVW, inverse variance weighted; LDL, low-density lipoprotein; MI, myocardial infarction; PCSK9, proprotein convertase subtilisin/kexin type 9. Estimates are expressed in odds ratio per 1-standard deviation (around 0.87 mmol/L) reduction in plasma LDL-cholesterol. \* denotes  $p$  value  $<0.05$ ; \*\* denotes  $p$  value  $<0.001$ .

**(a) CAD (CARDIoGRAMplusC4D)**

■ IVW ◊ Weighted median ● MR Egger

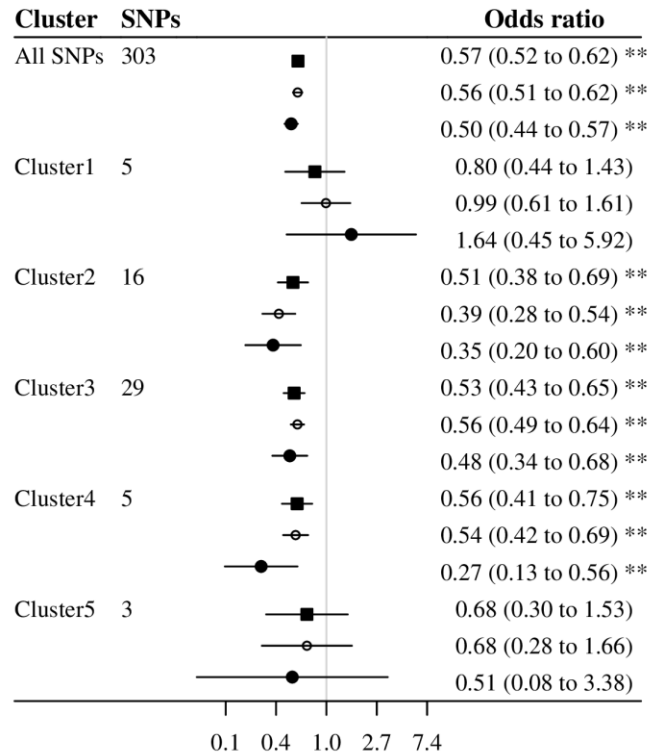

**(b) MI (Biobank Japan)**

■ IVW ◊ Weighted median ● MR Egger

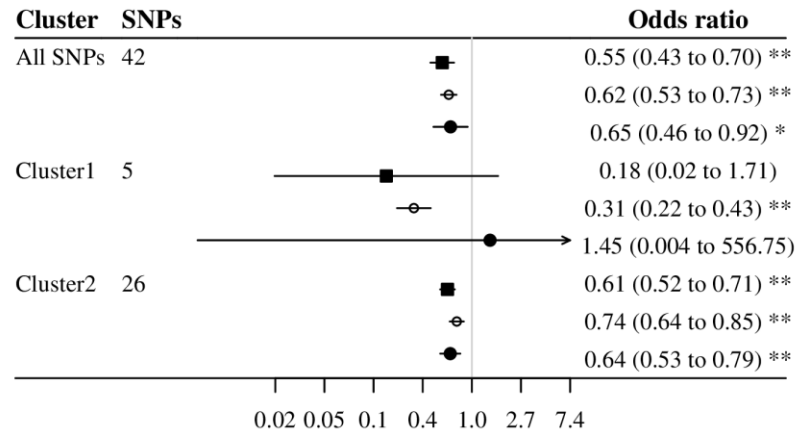

Supplemental Figure 3. Mendelian randomization estimates for genetically predicted lower LDL-cholesterol on risk of CAD and MI using all SNPs and cluster-specific SNPs (inclusion probability >0.80).

CAD, coronary artery disease; CARDIoGRAMplusC4D, Coronary ARtery DIsease Genome wide Replication and Meta-analysis plus The Coronary Artery Disease Genetics; IVW, inverse variance weighted; LDL, low-density lipoprotein; MI, myocardial infarction. Estimates are expressed in odds ratio per 1-standard deviation (around 0.87 mmol/L) reduction in plasma LDL-cholesterol. \* denotes  $p$  value <0.05; \*\* denotes  $p$  value <0.001.

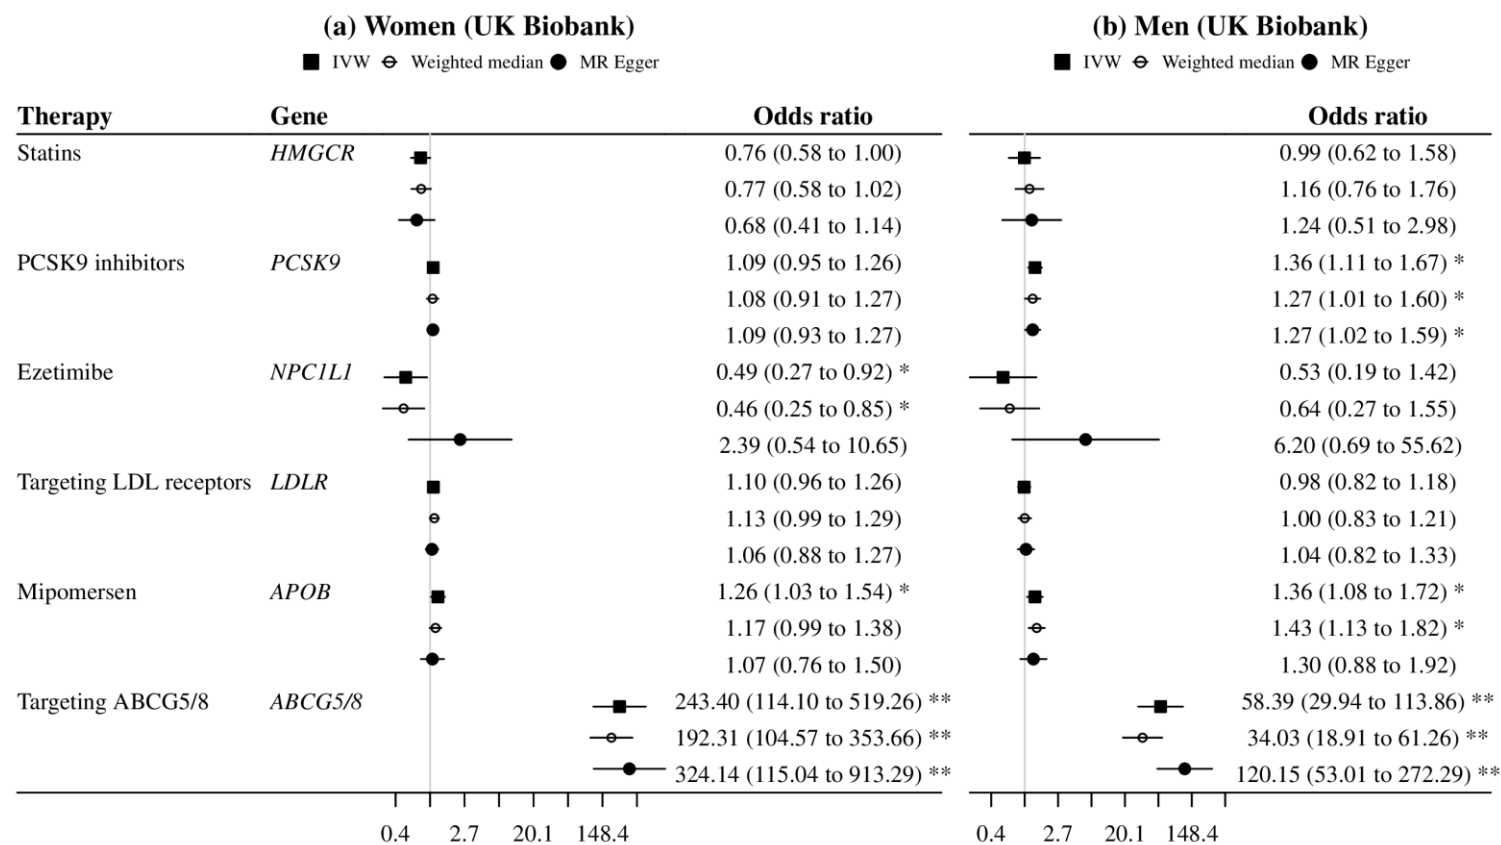

Supplemental Figure 4. Sex-specific Mendelian randomization estimates for genetic mimics of plasma LDL-cholesterol lowering therapies on risk of gallstone disease in the UK Biobank.

ABCG5/8, adenosine triphosphate (ATP)-binding cassette transporters G5/8; IVW, inverse variance weighted; LDL, low-density lipoprotein; PCSK9, proprotein convertase subtilisin/kexin type 9. Estimates are expressed in odds ratio per 1-standard deviation (around 0.87 mmol/L) reduction in plasma LDL-cholesterol. \* denotes  $p$  value  $<0.05$ ; \*\* denotes  $p$  value  $<0.001$ .

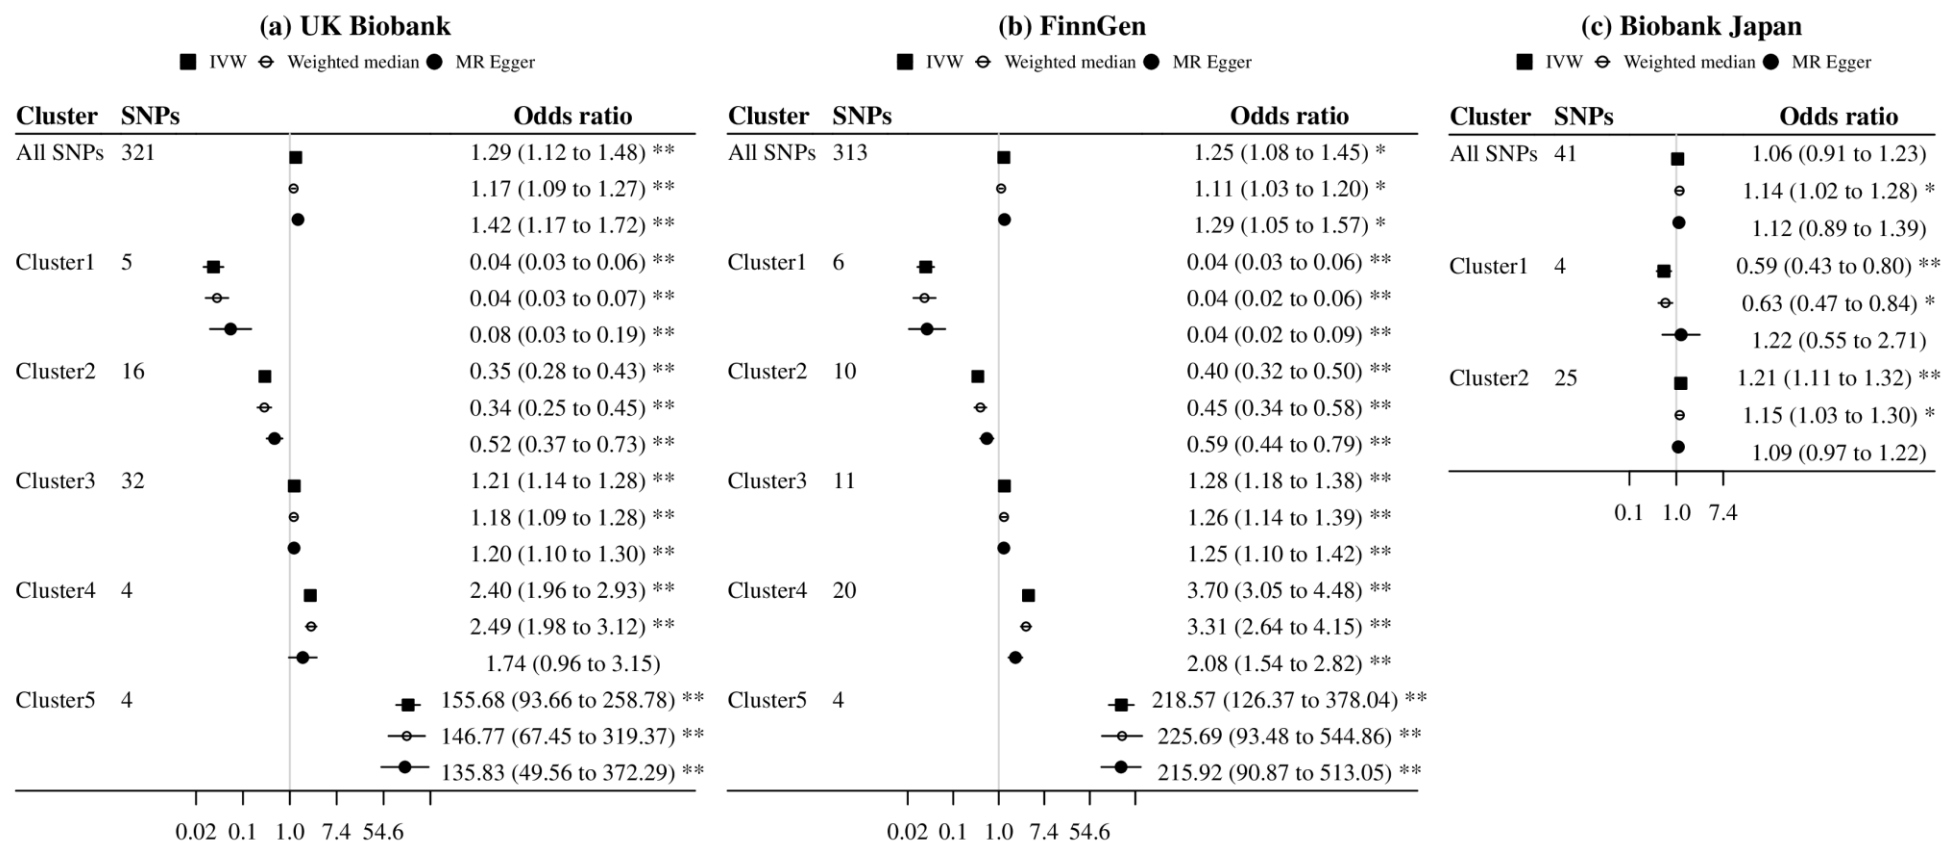

Supplemental Figure 5. Mendelian randomization estimates for genetically predicted lower LDL-cholesterol on risk of gallstone disease using all SNPs and cluster-specific SNPs (inclusion probability >0.80) in sensitivity analysis excluding SNPs associated with common confounders.

IVW, inverse variance weighted; LDL, low-density lipoprotein. The SNPs excluded for UK Biobank and FinnGen were rs11499828, rs174547 and rs3184504; the SNP excluded for Biobank Japan was rs4646776. Estimates are expressed in odds ratio per 1-standard deviation (around 0.87 mmol/L) reduction in plasma LDL-cholesterol. \* denotes  $p$  value <0.05; \*\* denotes  $p$  value <0.001.

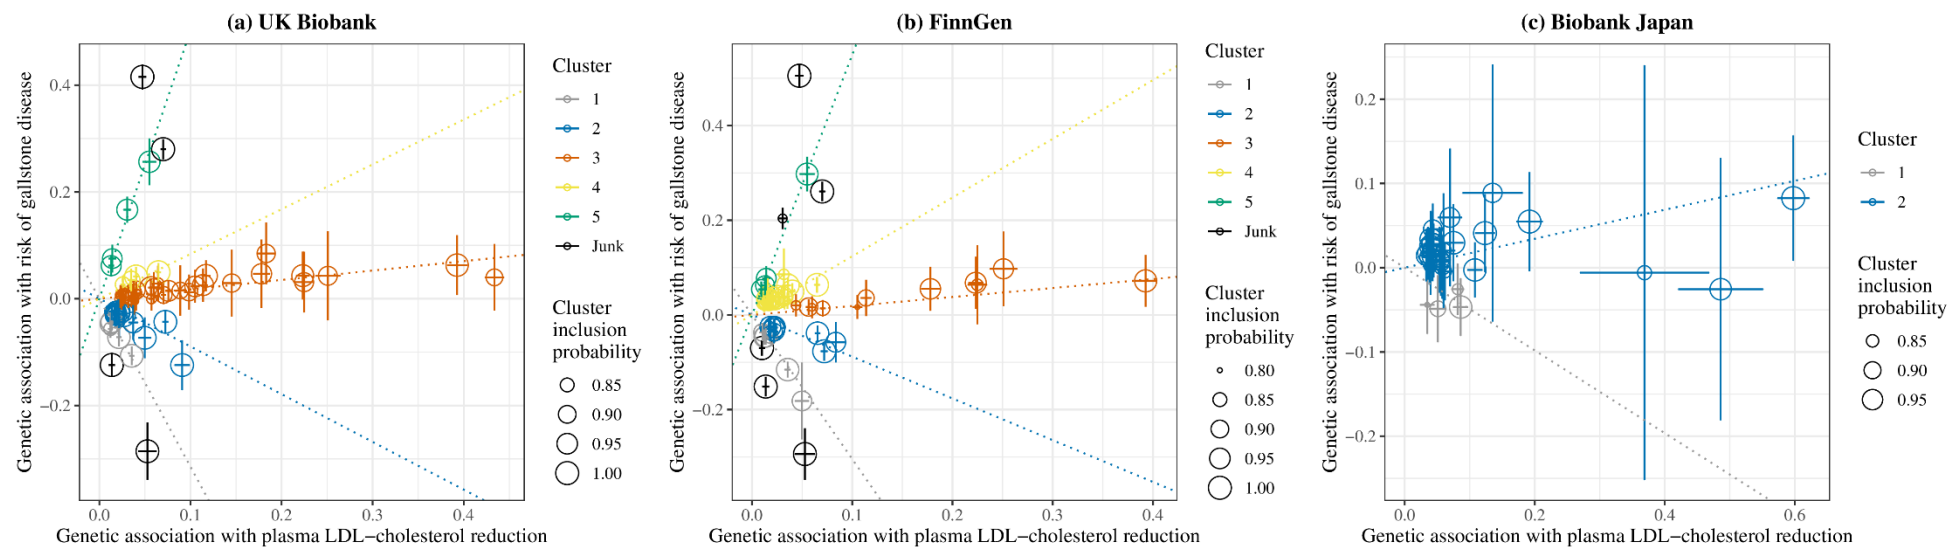

Supplemental Figure 6. Genetic associations with plasma LDL-cholesterol reduction (standard deviation) and risk of gallstone disease (log odds) for SNPs with inclusion probability >0.80 in clustered Mendelian randomization analyses excluding SNPs associated with common confounders.

LDL, low-density lipoprotein. The SNPs excluded for UK Biobank and FinnGen were rs11499828, rs174547 and rs3184504; the SNP excluded for Biobank Japan was rs4646776. Points represent SNPs; dotted lines are cluster means; error bars are 95% confidence intervals for genetic associations.

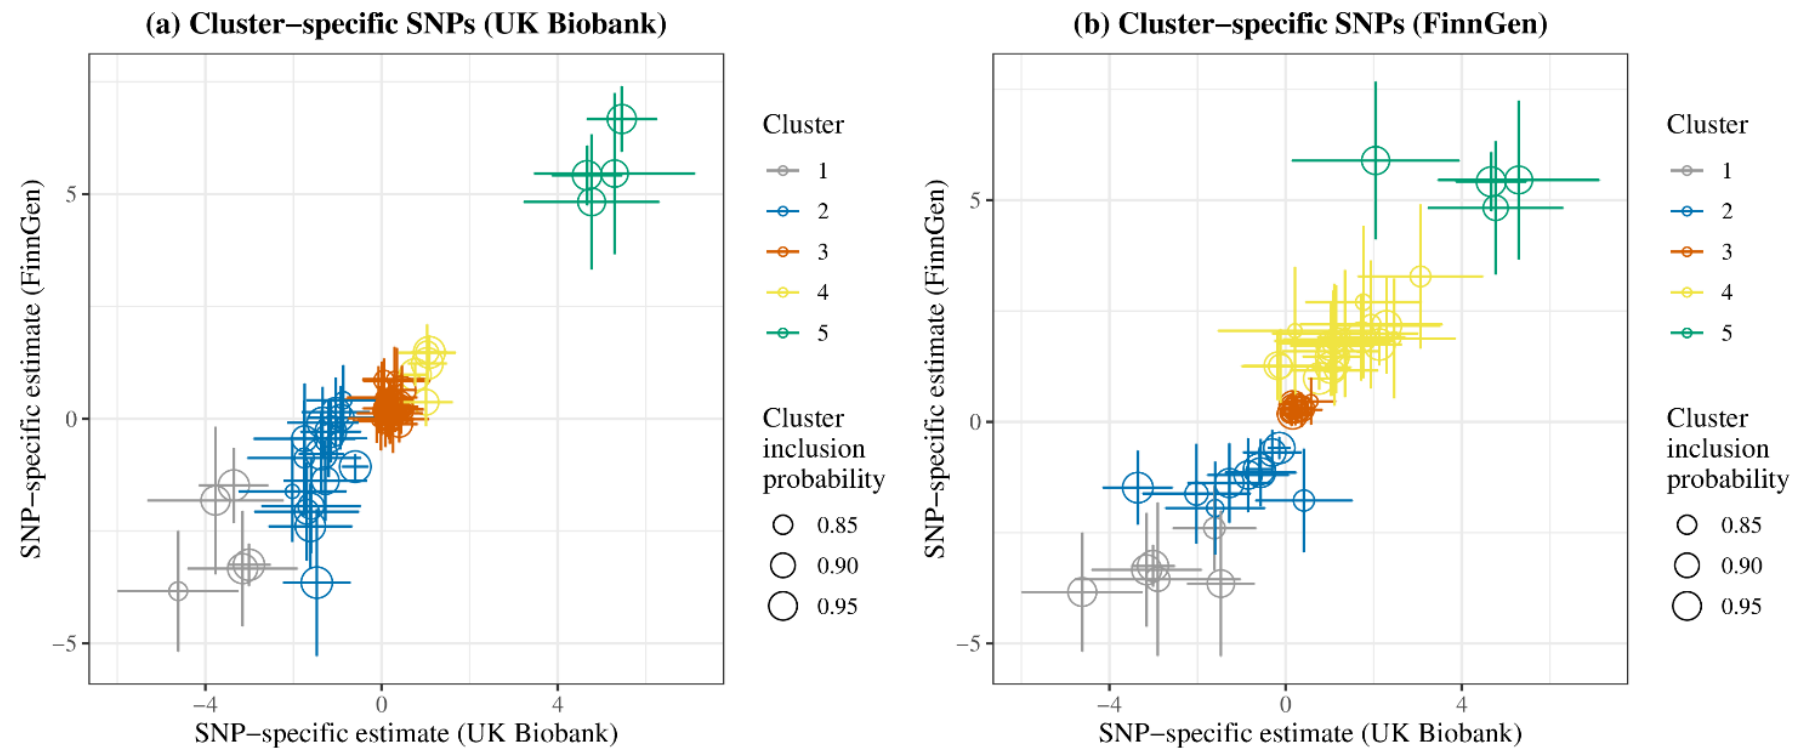

Supplemental Figure 7. SNP-specific estimates for genetically predicted lower plasma LDL-cholesterol on risk of gallstone disease in the UK Biobank and FinnGen for SNPs with inclusion probability  $>0.80$  in clustered Mendelian randomization analyses.

LDL, low-density lipoprotein. Points represent SNPs; error bars are 95% confidence intervals for SNP-specific estimates. Estimates are expressed in log odds per 1-standard deviation (around 0.87 mmol/L) reduction in plasma LDL-cholesterol.

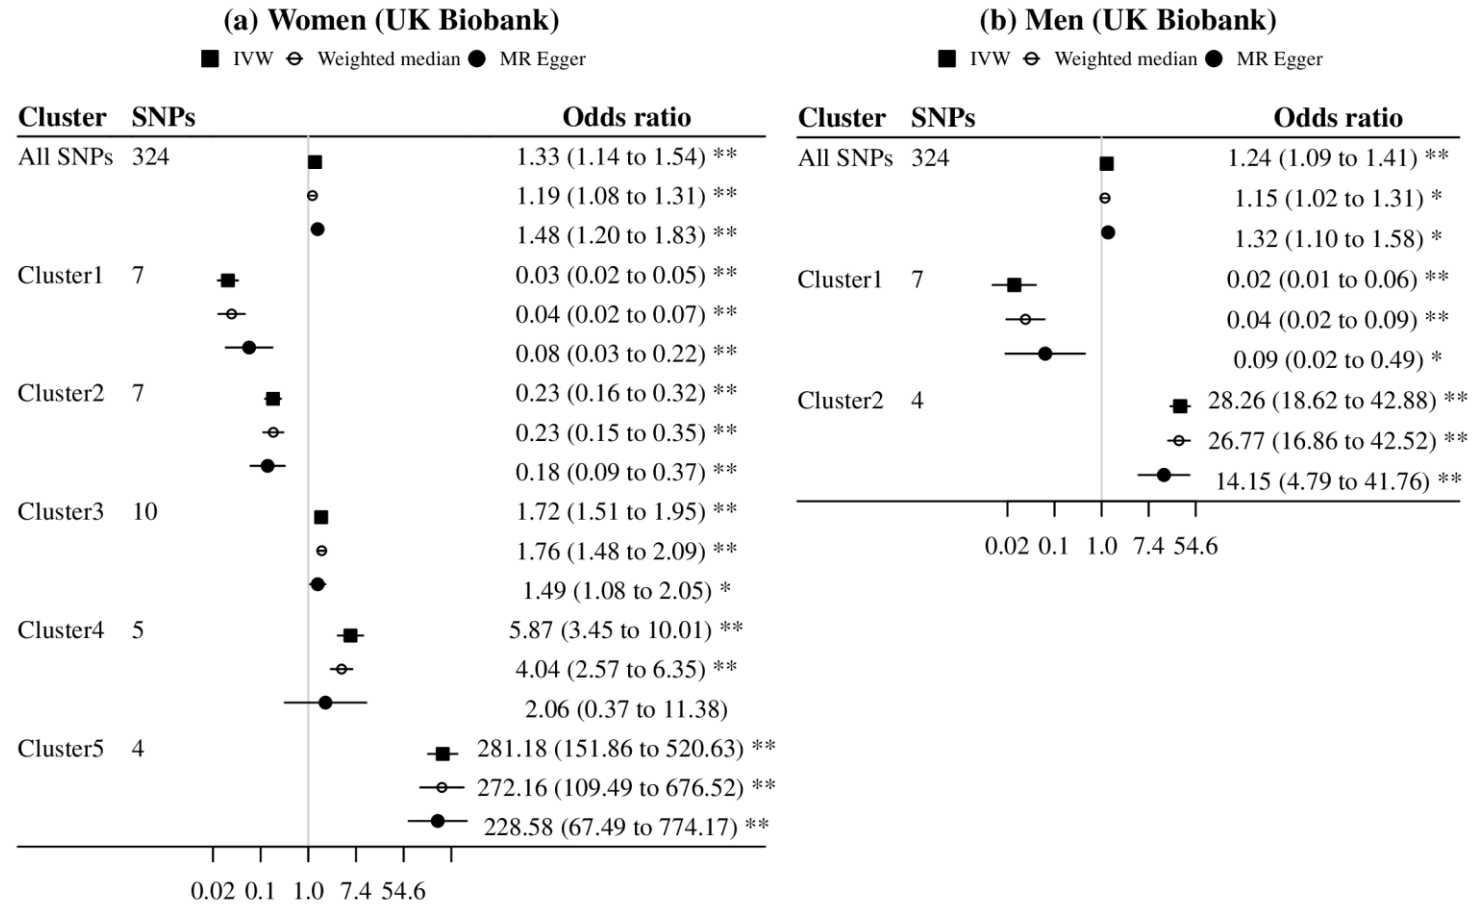

Supplemental Figure 8. Sex-specific Mendelian randomization estimates for genetically predicted lower LDL-cholesterol on risk of gallstone disease using all SNPs and cluster-specific SNPs (inclusion probability >0.80).

IVW, inverse variance weighted; LDL, low-density lipoprotein. Estimates are expressed in odds ratio per 1-standard deviation (around 0.87 mmol/L) reduction in plasma LDL-cholesterol. \* denotes  $p$  value <0.05; \*\* denotes  $p$  value <0.001.



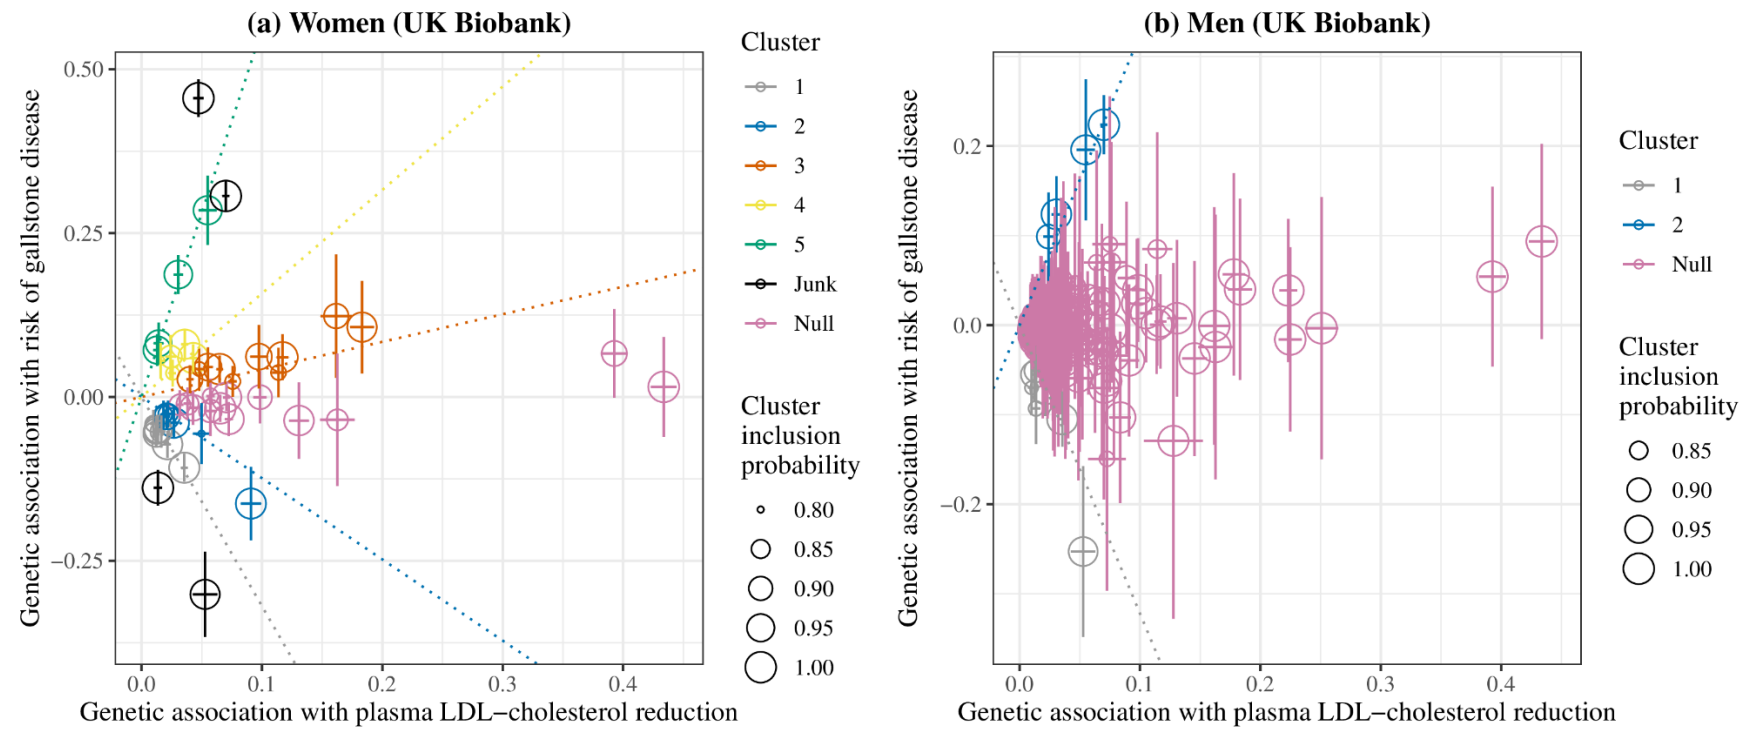

Supplemental Figure 9. Sex-specific genetic associations with plasma LDL-cholesterol reduction (standard deviation) and risk of gallstone disease (log odds) for SNPs with inclusion probability >0.80 in clustered Mendelian randomization analyses in the UK Biobank.

LDL, low-density lipoprotein. Points represent SNPs; dotted lines are cluster means; error bars are 95% confidence intervals for genetic associations.

Supplemental Table 1. Definition codes of gallstone disease across the three biobanks.

| Biobank       | Definition                                          | ICD-10                                                                 | ICD-9                                                                                    | ICD-8                     | UKB        | OPCS4                                                                                                                        | OPCS3                   |
|---------------|-----------------------------------------------------|------------------------------------------------------------------------|------------------------------------------------------------------------------------------|---------------------------|------------|------------------------------------------------------------------------------------------------------------------------------|-------------------------|
| UK Biobank    | Gallstone-related pathology                         | K56.3, K80, K81,<br>K85.1, K91.5,<br>K91.86                            | 560.31, 574,<br>575.0, 575.1,<br>576.0, 997.41                                           | -                         | 1160-1163  | -                                                                                                                            | -                       |
|               | Gallstone-related procedures                        | -                                                                      | -                                                                                        | -                         | 1455, 1528 | J18, J21.1, J24.2, J24.3, J26.1,<br>J33.1, J33.2, J38.1, J41.1,<br>J41.3, J42.3, J49.1, J49.2,<br>J52.1, J60.2, J68.1, J76.1 | 511, 521,<br>522, 530.2 |
|               | Alternative pathology                               | C17.0, C22-25,<br>D01.5, D13.2, D13.4-<br>13.7, S36.1, K82.4,<br>K83.5 | 152.0, 155-157,<br>230.8, 211.2,<br>211.5-211.7,<br>230.8, 575.6, 864,<br>868.02, 868.12 | -                         | 1024-1026  | -                                                                                                                            | -                       |
| FinnGen       | Cholelithiasis, broad definition with cholecystitis | K80, K81                                                               | 574, 575.0, 575.1                                                                        | 574,<br>5750.0-<br>5750.3 | -          | -                                                                                                                            | -                       |
| Biobank Japan | Cholelithiasis                                      | K80                                                                    | -                                                                                        | -                         | -          | -                                                                                                                            | -                       |

ICD, International Classification of Diseases; OPCS, Office of Population Censuses and Surveys Classification of Surgical Operations and Procedures; UKB, UK Biobank codes for self-reported conditions verified by medical notes. UK Biobank participants with codes for gallstone-related pathology or procedures were defined as cases, but those who underwent gallstone-related procedures with alternative pathology were excluded from the analysis.

Supplemental Table 2. Description of GWAS data used in this study.

| Phenotype               | Study                 | Ancestry                   | Sample size                                                            | Covariates                                                                                                                                                                         |
|-------------------------|-----------------------|----------------------------|------------------------------------------------------------------------|------------------------------------------------------------------------------------------------------------------------------------------------------------------------------------|
| Gallstone disease       | UK Biobank            | European                   | Cases = 21,201 women/9,346 men<br>Controls = 177,478 women/159,264 men | Age, age <sup>2</sup> , sex, age * sex, age <sup>2</sup> * sex, and the first 20 PCs in sex-combined analyses; age, age <sup>2</sup> and the first 20 PCs in sex-specific analyses |
| Gallstone disease       | FinnGen               | European                   | Cases = 34,461<br>Controls = 301,383                                   | Age, sex, genotyping batch, and ten PCs                                                                                                                                            |
| Gallstone disease       | Biobank Japan         | East Asian                 | Cases = 9,305<br>Controls = 168,253                                    | Age, age <sup>2</sup> , sex, age * sex, age <sup>2</sup> * sex, and the first 20 PCs                                                                                               |
| Plasma LDL-cholesterol  | GLGC                  | European                   | <i>N</i> = 1,231,289                                                   | Age, age <sup>2</sup> , sex, PCs of ancestry and study-specific covariates                                                                                                         |
| Plasma LDL-cholesterol  | GLGC                  | East Asian                 | <i>N</i> = 82,587                                                      | Age, age <sup>2</sup> , sex, PCs of ancestry and study-specific covariates                                                                                                         |
| Coronary artery disease | CARDIoGRAM<br>plusC4D | Mixed (mainly<br>European) | Cases = 60,801<br>Controls = 123,504                                   | Study-specific covariates                                                                                                                                                          |
| Myocardial infarction   | Biobank Japan         | East Asian                 | Cases = 14,992<br>Controls = 146,214                                   | Age, age <sup>2</sup> , sex, age * sex, age <sup>2</sup> * sex, and the first 20 PCs                                                                                               |

CARDIoGRAMplusC4D, Coronary ARtery DIsease Genome wide Replication and Meta-analysis plus The Coronary Artery Disease Genetics; GLGC, Global Lipids Genetics Consortium; GWAS, genome-wide association studies; LDL, low-density lipoprotein; PC, principal components.

Supplemental Table 3. SNP-specific estimates for genetic mimics of plasma LDL-cholesterol lowering therapies on plasma LDL-cholesterol (standard deviation) in people of European and East Asian ancestry.

| Ancestry | Therapy | Gene         | SNP         | Effect allele | Other allele | Effect allele frequency | Beta    | SE     | <i>P</i> value | F-statistic |
|----------|---------|--------------|-------------|---------------|--------------|-------------------------|---------|--------|----------------|-------------|
| European | Statins | <i>HMGCR</i> | rs375392181 | T             | G            | 0.010                   | 0.0454  | 0.0071 | 3.0E-08        | 41.3        |
| European | Statins | <i>HMGCR</i> | rs72768351  | G             | A            | 0.019                   | -0.0401 | 0.0055 | 4.4E-10        | 52.3        |
| European | Statins | <i>HMGCR</i> | rs75144964  | G             | C            | 0.016                   | -0.0403 | 0.0060 | 6.4E-09        | 45.3        |
| European | Statins | <i>HMGCR</i> | rs1423527   | A             | C            | 0.399                   | 0.0653  | 0.0014 | <4.9E-324      | 2127.3      |
| European | Statins | <i>HMGCR</i> | rs35122945  | C             | A            | 0.067                   | -0.0371 | 0.0030 | 5.2E-27        | 155.6       |
| European | Statins | <i>HMGCR</i> | rs115664150 | T             | C            | 0.062                   | 0.0431  | 0.0029 | 9.9E-38        | 221.4       |
| European | Statins | <i>HMGCR</i> | rs75240579  | T             | C            | 0.040                   | -0.0404 | 0.0038 | 1.7E-20        | 115.7       |
| European | Statins | <i>HMGCR</i> | rs112672253 | T             | A            | 0.008                   | 0.0576  | 0.0083 | 1.9E-09        | 48.4        |
| European | Statins | <i>HMGCR</i> | rs17244939  | C             | A            | 0.016                   | -0.0430 | 0.0062 | 1.7E-09        | 48.8        |
| European | Statins | <i>HMGCR</i> | rs115169875 | A             | G            | 0.026                   | -0.0337 | 0.0046 | 2.9E-10        | 53.4        |
| European | Statins | <i>HMGCR</i> | rs151264833 | G             | C            | 0.024                   | 0.0340  | 0.0046 | 1.5E-10        | 55.0        |
| European | Statins | <i>HMGCR</i> | rs62366588  | A             | C            | 0.058                   | -0.0346 | 0.0032 | 1.0E-20        | 117.0       |
| European | Statins | <i>HMGCR</i> | rs74695562  | G             | T            | 0.042                   | -0.0369 | 0.0037 | 7.1E-18        | 99.7        |
| European | Statins | <i>HMGCR</i> | rs78587954  | G             | C            | 0.065                   | 0.0526  | 0.0028 | 2.7E-58        | 348.1       |
| European | Statins | <i>HMGCR</i> | rs144083983 | T             | C            | 0.070                   | -0.0418 | 0.0030 | 1.9E-33        | 195.2       |
| European | Statins | <i>HMGCR</i> | rs181668591 | T             | C            | 0.010                   | 0.0604  | 0.0072 | 5.6E-13        | 69.8        |
| European | Statins | <i>HMGCR</i> | rs114253542 | C             | T            | 0.007                   | 0.0759  | 0.0087 | 3.9E-14        | 76.8        |
| European | Statins | <i>HMGCR</i> | rs180755046 | A             | C            | 0.016                   | -0.0421 | 0.0062 | 5.5E-09        | 45.7        |
| European | Statins | <i>HMGCR</i> | rs182826525 | G             | A            | 0.014                   | 0.1035  | 0.0086 | 4.2E-25        | 143.9       |

|          |                  |              |             |   |   |       |         |        |           |        |
|----------|------------------|--------------|-------------|---|---|-------|---------|--------|-----------|--------|
| European | Statins          | <i>HMGCR</i> | rs151000110 | A | G | 0.057 | 0.0670  | 0.0031 | 1.5E-77   | 466.7  |
| European | Statins          | <i>HMGCR</i> | rs200823803 | C | T | 0.018 | 0.0551  | 0.0060 | 2.2E-15   | 84.5   |
| European | PCSK9 inhibitors | <i>PCSK9</i> | rs12043403  | C | T | 0.098 | -0.0245 | 0.0025 | 1.0E-17   | 98.7   |
| European | PCSK9 inhibitors | <i>PCSK9</i> | rs12409233  | C | G | 0.088 | -0.0226 | 0.0024 | 1.6E-15   | 85.3   |
| European | PCSK9 inhibitors | <i>PCSK9</i> | rs11206498  | G | A | 0.342 | 0.0103  | 0.0015 | 1.4E-09   | 49.3   |
| European | PCSK9 inhibitors | <i>PCSK9</i> | rs890576    | G | C | 0.202 | -0.0153 | 0.0017 | 4.6E-14   | 76.4   |
| European | PCSK9 inhibitors | <i>PCSK9</i> | rs145075626 | G | C | 0.017 | -0.0503 | 0.0055 | 3.0E-15   | 83.6   |
| European | PCSK9 inhibitors | <i>PCSK9</i> | rs17111474  | T | C | 0.296 | 0.0113  | 0.0016 | 2.4E-09   | 47.9   |
| European | PCSK9 inhibitors | <i>PCSK9</i> | rs77875082  | A | G | 0.031 | 0.0538  | 0.0042 | 3.4E-28   | 162.8  |
| European | PCSK9 inhibitors | <i>PCSK9</i> | rs2495503   | A | G | 0.258 | 0.0349  | 0.0016 | 2.3E-80   | 484.1  |
| European | PCSK9 inhibitors | <i>PCSK9</i> | rs34232196  | T | C | 0.242 | -0.0663 | 0.0016 | 3.0E-266  | 1632.3 |
| European | PCSK9 inhibitors | <i>PCSK9</i> | rs374459115 | A | G | 0.017 | 0.0683  | 0.0068 | 2.8E-18   | 102.2  |
| European | PCSK9 inhibitors | <i>PCSK9</i> | rs28775984  | C | T | 0.432 | -0.0193 | 0.0030 | 4.3E-08   | 40.3   |
| European | PCSK9 inhibitors | <i>PCSK9</i> | rs182491400 | T | C | 0.021 | 0.0445  | 0.0056 | 4.9E-12   | 64.1   |
| European | PCSK9 inhibitors | <i>PCSK9</i> | rs181331606 | G | C | 0.090 | 0.0286  | 0.0030 | 1.0E-16   | 92.6   |
| European | PCSK9 inhibitors | <i>PCSK9</i> | rs12739979  | T | C | 0.238 | -0.0270 | 0.0018 | 6.3E-38   | 222.6  |
| European | PCSK9 inhibitors | <i>PCSK9</i> | rs11810371  | A | G | 0.043 | -0.0423 | 0.0037 | 2.7E-23   | 132.8  |
| European | PCSK9 inhibitors | <i>PCSK9</i> | rs72660548  | G | C | 0.020 | 0.0704  | 0.0050 | 1.2E-34   | 202.4  |
| European | PCSK9 inhibitors | <i>PCSK9</i> | rs17111503  | G | A | 0.256 | 0.0487  | 0.0016 | 6.8E-151  | 919.5  |
| European | PCSK9 inhibitors | <i>PCSK9</i> | rs2479408   | G | C | 0.199 | -0.0445 | 0.0018 | 1.7E-100  | 608.3  |
| European | PCSK9 inhibitors | <i>PCSK9</i> | rs11591147  | T | G | 0.016 | -0.4337 | 0.0054 | <4.9E-324 | 6388.7 |
| European | PCSK9 inhibitors | <i>PCSK9</i> | rs479832    | C | T | 0.178 | -0.0144 | 0.0019 | 1.8E-11   | 60.7   |
| European | PCSK9 inhibitors | <i>PCSK9</i> | rs41294825  | T | A | 0.043 | -0.0414 | 0.0034 | 1.2E-25   | 147.2  |

|          |                         |               |             |   |   |       |         |        |          |        |
|----------|-------------------------|---------------|-------------|---|---|-------|---------|--------|----------|--------|
| European | PCSK9 inhibitors        | <i>PCSK9</i>  | rs693668    | G | A | 0.359 | -0.0565 | 0.0015 | 2.6E-243 | 1490.6 |
| European | PCSK9 inhibitors        | <i>PCSK9</i>  | rs7525503   | T | G | 0.023 | 0.0713  | 0.0050 | 6.2E-35  | 204.2  |
| European | PCSK9 inhibitors        | <i>PCSK9</i>  | rs11206517  | G | T | 0.037 | 0.0889  | 0.0037 | 7.6E-95  | 573.4  |
| European | PCSK9 inhibitors        | <i>PCSK9</i>  | rs41297885  | G | C | 0.036 | -0.0406 | 0.0038 | 2.2E-20  | 115.0  |
| European | PCSK9 inhibitors        | <i>PCSK9</i>  | rs28385715  | G | T | 0.023 | 0.0456  | 0.0049 | 9.9E-16  | 86.6   |
| European | PCSK9 inhibitors        | <i>PCSK9</i>  | rs77011887  | T | C | 0.017 | 0.0459  | 0.0057 | 3.7E-12  | 64.8   |
| European | PCSK9 inhibitors        | <i>PCSK9</i>  | rs142116310 | A | G | 0.011 | 0.0554  | 0.0072 | 3.8E-11  | 58.7   |
| European | PCSK9 inhibitors        | <i>PCSK9</i>  | rs115465289 | A | G | 0.031 | -0.0407 | 0.0042 | 1.0E-16  | 92.7   |
| European | PCSK9 inhibitors        | <i>PCSK9</i>  | rs12031153  | A | G | 0.053 | 0.0331  | 0.0035 | 1.5E-16  | 91.6   |
| European | PCSK9 inhibitors        | <i>PCSK9</i>  | rs138779133 | G | A | 0.027 | -0.0599 | 0.0043 | 9.1E-33  | 190.9  |
| European | PCSK9 inhibitors        | <i>PCSK9</i>  | rs79494709  | C | G | 0.049 | -0.0258 | 0.0033 | 8.3E-12  | 62.7   |
| European | PCSK9 inhibitors        | <i>PCSK9</i>  | rs55817205  | A | G | 0.012 | 0.0676  | 0.0071 | 2.6E-16  | 90.1   |
| European | Ezetimibe               | <i>NPC1L1</i> | rs77826622  | C | T | 0.022 | 0.0313  | 0.0049 | 4.4E-08  | 40.2   |
| European | Ezetimibe               | <i>NPC1L1</i> | rs17725246  | C | T | 0.195 | 0.0428  | 0.0018 | 1.3E-94  | 572.0  |
| European | Ezetimibe               | <i>NPC1L1</i> | rs77517259  | T | C | 0.010 | 0.0503  | 0.0073 | 2.6E-09  | 47.6   |
| European | Ezetimibe               | <i>NPC1L1</i> | rs217370    | G | A | 0.467 | -0.0254 | 0.0014 | 1.3E-55  | 331.6  |
| European | Ezetimibe               | <i>NPC1L1</i> | rs79854399  | T | C | 0.019 | -0.0390 | 0.0052 | 1.2E-10  | 55.8   |
| European | Ezetimibe               | <i>NPC1L1</i> | rs143116067 | A | G | 0.068 | -0.0201 | 0.0029 | 3.7E-09  | 46.7   |
| European | Targeting LDL receptors | <i>LDLR</i>   | rs148724334 | C | G | 0.017 | 0.0428  | 0.0058 | 2.6E-10  | 53.7   |
| European | Targeting LDL receptors | <i>LDLR</i>   | rs117210556 | C | T | 0.065 | 0.0371  | 0.0028 | 5.8E-30  | 173.7  |
| European | Targeting LDL receptors | <i>LDLR</i>   | rs118115977 | T | C | 0.014 | 0.0394  | 0.0062 | 4.2E-08  | 40.4   |
| European | Targeting LDL receptors | <i>LDLR</i>   | rs12609589  | T | C | 0.157 | 0.0445  | 0.0020 | 3.4E-82  | 495.4  |
| European | Targeting LDL receptors | <i>LDLR</i>   | rs73013176  | C | T | 0.012 | -0.2141 | 0.0068 | 2.4E-164 | 1002.6 |

|          |                         |             |             |   |   |       |         |        |           |        |
|----------|-------------------------|-------------|-------------|---|---|-------|---------|--------|-----------|--------|
| European | Targeting LDL receptors | <i>LDLR</i> | rs10420325  | A | T | 0.350 | 0.0157  | 0.0023 | 2.0E-09   | 48.3   |
| European | Targeting LDL receptors | <i>LDLR</i> | rs138736573 | G | A | 0.009 | 0.0692  | 0.0074 | 1.1E-15   | 86.3   |
| European | Targeting LDL receptors | <i>LDLR</i> | rs36049922  | C | T | 0.035 | 0.0437  | 0.0040 | 1.7E-21   | 121.9  |
| European | Targeting LDL receptors | <i>LDLR</i> | rs56315738  | T | C | 0.008 | -0.1117 | 0.0089 | 2.0E-27   | 158.2  |
| European | Targeting LDL receptors | <i>LDLR</i> | rs73015007  | A | G | 0.241 | -0.0757 | 0.0016 | <4.9E-324 | 2127.3 |
| European | Targeting LDL receptors | <i>LDLR</i> | rs10423733  | C | T | 0.171 | -0.1315 | 0.0019 | <4.9E-324 | 4977.0 |
| European | Targeting LDL receptors | <i>LDLR</i> | rs112159161 | T | C | 0.015 | -0.2000 | 0.0059 | 1.6E-187  | 1145.9 |
| European | Targeting LDL receptors | <i>LDLR</i> | rs146335137 | T | C | 0.009 | 0.0618  | 0.0077 | 5.6E-12   | 63.8   |
| European | Targeting LDL receptors | <i>LDLR</i> | rs17242353  | T | C | 0.032 | 0.1091  | 0.0043 | 5.9E-108  | 654.4  |
| European | Targeting LDL receptors | <i>LDLR</i> | rs17242367  | T | C | 0.069 | 0.0283  | 0.0029 | 3.9E-17   | 95.1   |
| European | Targeting LDL receptors | <i>LDLR</i> | rs17248748  | T | C | 0.018 | -0.0749 | 0.0056 | 5.5E-31   | 180.0  |
| European | Targeting LDL receptors | <i>LDLR</i> | rs6511721   | G | A | 0.483 | 0.0590  | 0.0014 | 4.3E-270  | 1656.1 |
| European | Targeting LDL receptors | <i>LDLR</i> | rs73015030  | A | G | 0.032 | -0.1334 | 0.0040 | 1.1E-179  | 1097.5 |
| European | Targeting LDL receptors | <i>LDLR</i> | rs560115066 | G | T | 0.036 | 0.0725  | 0.0045 | 6.6E-44   | 259.4  |
| European | Targeting LDL receptors | <i>LDLR</i> | rs62129100  | G | A | 0.172 | 0.0214  | 0.0032 | 8.4E-09   | 44.6   |
| European | Targeting LDL receptors | <i>LDLR</i> | rs147223423 | T | A | 0.010 | 0.0999  | 0.0071 | 5.7E-34   | 198.3  |
| European | Targeting LDL receptors | <i>LDLR</i> | rs17249001  | A | G | 0.071 | 0.0715  | 0.0029 | 2.3E-99   | 601.4  |
| European | Targeting LDL receptors | <i>LDLR</i> | rs3826810   | A | G | 0.043 | 0.0376  | 0.0034 | 2.9E-21   | 120.3  |
| European | Targeting LDL receptors | <i>LDLR</i> | rs5742911   | G | A | 0.312 | -0.0659 | 0.0015 | 6.0E-306  | 1877.7 |
| European | Targeting LDL receptors | <i>LDLR</i> | rs143587805 | T | A | 0.012 | 0.0631  | 0.0067 | 4.0E-16   | 89.0   |
| European | Targeting LDL receptors | <i>LDLR</i> | rs147540853 | A | G | 0.026 | -0.0911 | 0.0043 | 5.6E-75   | 450.9  |
| European | Targeting LDL receptors | <i>LDLR</i> | rs111622889 | T | C | 0.021 | 0.0447  | 0.0056 | 6.7E-12   | 63.3   |
| European | Targeting LDL receptors | <i>LDLR</i> | rs148362484 | T | C | 0.028 | 0.0286  | 0.0044 | 1.7E-08   | 42.8   |

|          |                         |             |             |   |   |       |         |        |           |        |
|----------|-------------------------|-------------|-------------|---|---|-------|---------|--------|-----------|--------|
| European | Targeting LDL receptors | <i>LDLR</i> | rs189143685 | T | C | 0.011 | 0.0494  | 0.0069 | 6.1E-10   | 51.4   |
| European | Targeting LDL receptors | <i>LDLR</i> | rs72983207  | T | A | 0.018 | -0.0443 | 0.0056 | 1.1E-11   | 62.0   |
| European | Targeting LDL receptors | <i>LDLR</i> | rs4804573   | A | G | 0.467 | -0.0630 | 0.0014 | 1.9e-310  | 1905.5 |
| European | Targeting LDL receptors | <i>LDLR</i> | rs117339792 | A | G | 0.016 | -0.0846 | 0.0061 | 1.2E-32   | 190.1  |
| European | Targeting LDL receptors | <i>LDLR</i> | rs146576912 | T | C | 0.051 | -0.1555 | 0.0035 | <4.9E-324 | 1992.1 |
| European | Targeting LDL receptors | <i>LDLR</i> | rs4804149   | C | T | 0.288 | 0.0241  | 0.0016 | 1.8E-37   | 219.9  |
| European | Targeting LDL receptors | <i>LDLR</i> | rs379309    | C | T | 0.495 | 0.0252  | 0.0014 | 2.8E-52   | 311.0  |
| European | Targeting LDL receptors | <i>LDLR</i> | rs139198665 | T | C | 0.026 | 0.0614  | 0.0048 | 2.5E-28   | 163.6  |
| European | Targeting LDL receptors | <i>LDLR</i> | rs140842514 | C | A | 0.029 | -0.0283 | 0.0043 | 1.3E-08   | 43.4   |
| European | Targeting LDL receptors | <i>LDLR</i> | rs12975458  | A | G | 0.057 | 0.0214  | 0.0031 | 1.6E-09   | 48.9   |
| European | Targeting LDL receptors | <i>LDLR</i> | rs34243815  | T | C | 0.063 | -0.0232 | 0.0029 | 8.9E-12   | 62.5   |
| European | Targeting LDL receptors | <i>LDLR</i> | rs9967639   | T | A | 0.074 | 0.0222  | 0.0027 | 9.6E-13   | 68.4   |
| European | Targeting LDL receptors | <i>LDLR</i> | rs66466742  | T | C | 0.039 | -0.0514 | 0.0035 | 6.7E-36   | 210.2  |
| European | Targeting LDL receptors | <i>LDLR</i> | rs1433091   | A | G | 0.088 | 0.0305  | 0.0026 | 4.3E-24   | 137.7  |
| European | Mipomersen              | <i>APOB</i> | rs62120800  | A | G | 0.013 | -0.1088 | 0.0062 | 5.7E-51   | 302.9  |
| European | Mipomersen              | <i>APOB</i> | rs137978266 | G | A | 0.013 | 0.0818  | 0.0062 | 2.5E-30   | 176.0  |
| European | Mipomersen              | <i>APOB</i> | rs79106033  | T | C | 0.026 | -0.0300 | 0.0044 | 5.8E-09   | 45.5   |
| European | Mipomersen              | <i>APOB</i> | rs576306544 | A | C | 0.012 | -0.0578 | 0.0074 | 1.2E-11   | 61.8   |
| European | Mipomersen              | <i>APOB</i> | rs1317821   | T | C | 0.253 | 0.0515  | 0.0016 | 1.1E-169  | 1035.5 |
| European | Mipomersen              | <i>APOB</i> | rs76384951  | C | A | 0.076 | -0.0182 | 0.0027 | 9.8E-09   | 44.2   |
| European | Mipomersen              | <i>APOB</i> | rs62122481  | A | C | 0.359 | 0.0705  | 0.0015 | <4.9E-324 | 2347.9 |
| European | Mipomersen              | <i>APOB</i> | rs1042023   | C | G | 0.012 | 0.1359  | 0.0068 | 1.3E-67   | 405.5  |
| European | Mipomersen              | <i>APOB</i> | rs533617    | C | T | 0.041 | -0.1261 | 0.0035 | 4.9E-215  | 1315.8 |



|          |                   |                |             |   |   |       |         |        |           |        |
|----------|-------------------|----------------|-------------|---|---|-------|---------|--------|-----------|--------|
| European | Mipomersen        | <i>APOB</i>    | rs497166    | T | C | 0.020 | -0.0959 | 0.0049 | 2.7E-63   | 378.9  |
| European | Mipomersen        | <i>APOB</i>    | rs184507838 | T | C | 0.010 | -0.1258 | 0.0069 | 2.8E-56   | 335.6  |
| European | Mipomersen        | <i>APOB</i>    | rs531819    | T | G | 0.147 | -0.1160 | 0.0020 | <4.9E-324 | 3441.1 |
| European | Mipomersen        | <i>APOB</i>    | rs72653053  | C | T | 0.011 | -0.0799 | 0.0068 | 3.5E-24   | 138.2  |
| European | Mipomersen        | <i>APOB</i>    | rs9282606   | T | G | 0.045 | 0.0649  | 0.0034 | 2.9E-59   | 354.0  |
| European | Mipomersen        | <i>APOB</i>    | rs3056574   | A | T | 0.137 | 0.0302  | 0.0026 | 3.7E-23   | 132.0  |
| European | Mipomersen        | <i>APOB</i>    | rs72902579  | C | T | 0.038 | -0.0975 | 0.0037 | 6.6E-115  | 697.3  |
| European | Mipomersen        | <i>APOB</i>    | rs200362396 | A | T | 0.344 | 0.0533  | 0.0032 | 3.8E-46   | 273.2  |
| European | Mipomersen        | <i>APOB</i>    | rs72780178  | C | A | 0.027 | 0.0608  | 0.0043 | 1.2E-33   | 196.4  |
| European | Mipomersen        | <i>APOB</i>    | rs78158108  | C | G | 0.074 | 0.0817  | 0.0027 | 5.9E-146  | 889.0  |
| European | Mipomersen        | <i>APOB</i>    | rs377122620 | G | T | 0.097 | 0.1046  | 0.0041 | 2.2E-105  | 638.5  |
| European | Mipomersen        | <i>APOB</i>    | rs145713446 | A | T | 0.006 | 0.0971  | 0.0096 | 2.6E-18   | 102.3  |
| European | Mipomersen        | <i>APOB</i>    | rs114185526 | T | C | 0.008 | -0.1056 | 0.0082 | 7.6E-29   | 166.8  |
| European | Mipomersen        | <i>APOB</i>    | rs17395484  | T | C | 0.022 | 0.0669  | 0.0049 | 4.7E-32   | 186.6  |
| European | Mipomersen        | <i>APOB</i>    | rs548774896 | G | T | 0.118 | 0.0667  | 0.0042 | 4.7E-42   | 248.0  |
| European | Mipomersen        | <i>APOB</i>    | rs72782175  | C | T | 0.014 | -0.0955 | 0.0060 | 2.4E-42   | 249.8  |
| European | Targeting ABCG5/8 | <i>ABCG5/8</i> | rs145288624 | T | C | 0.066 | 0.0281  | 0.0030 | 7.0E-16   | 87.5   |
| European | Targeting ABCG5/8 | <i>ABCG5/8</i> | rs78354019  | G | A | 0.056 | 0.0230  | 0.0031 | 8.9E-11   | 56.5   |
| European | Targeting ABCG5/8 | <i>ABCG5/8</i> | rs143706998 | C | A | 0.008 | -0.1129 | 0.0081 | 2.0E-33   | 194.9  |
| European | Targeting ABCG5/8 | <i>ABCG5/8</i> | rs576115488 | G | T | 0.012 | -0.0877 | 0.0082 | 1.6E-20   | 115.7  |
| European | Targeting ABCG5/8 | <i>ABCG5/8</i> | rs113140405 | T | C | 0.018 | -0.0504 | 0.0057 | 1.7E-14   | 79.0   |
| European | Targeting ABCG5/8 | <i>ABCG5/8</i> | rs10186086  | A | T | 0.194 | -0.0216 | 0.0018 | 5.8E-26   | 149.1  |
| European | Targeting ABCG5/8 | <i>ABCG5/8</i> | rs531043156 | G | T | 0.018 | -0.0907 | 0.0076 | 3.9E-25   | 144.1  |

|            |                   |                |             |   |   |       |         |        |           |        |
|------------|-------------------|----------------|-------------|---|---|-------|---------|--------|-----------|--------|
| European   | Targeting ABCG5/8 | <i>ABCG5/8</i> | rs139029940 | A | C | 0.152 | 0.0348  | 0.0020 | 1.6E-51   | 306.2  |
| European   | Targeting ABCG5/8 | <i>ABCG5/8</i> | rs4131228   | G | A | 0.021 | 0.0415  | 0.0052 | 4.5E-12   | 64.3   |
| European   | Targeting ABCG5/8 | <i>ABCG5/8</i> | rs182201537 | G | A | 0.009 | 0.0835  | 0.0078 | 2.7E-20   | 114.5  |
| European   | Targeting ABCG5/8 | <i>ABCG5/8</i> | rs116487096 | A | T | 0.039 | -0.0288 | 0.0037 | 1.8E-11   | 60.6   |
| European   | Targeting ABCG5/8 | <i>ABCG5/8</i> | rs75331444  | A | G | 0.066 | -0.1146 | 0.0028 | 3.6E-278  | 1706.0 |
| European   | Targeting ABCG5/8 | <i>ABCG5/8</i> | rs55726838  | A | G | 0.010 | 0.0784  | 0.0075 | 2.3E-19   | 108.8  |
| European   | Targeting ABCG5/8 | <i>ABCG5/8</i> | rs4299376   | G | T | 0.309 | 0.0700  | 0.0015 | <4.9E-324 | 2155.6 |
| European   | Targeting ABCG5/8 | <i>ABCG5/8</i> | rs67734975  | G | C | 0.045 | 0.0525  | 0.0033 | 1.0E-42   | 252.1  |
| European   | Targeting ABCG5/8 | <i>ABCG5/8</i> | rs10221914  | T | C | 0.028 | 0.0296  | 0.0045 | 1.2E-08   | 43.6   |
| European   | Targeting ABCG5/8 | <i>ABCG5/8</i> | rs4148216   | T | C | 0.169 | -0.0281 | 0.0019 | 7.6E-39   | 228.3  |
| European   | Targeting ABCG5/8 | <i>ABCG5/8</i> | rs187356514 | C | T | 0.013 | 0.0507  | 0.0063 | 5.0E-12   | 64.0   |
| European   | Targeting ABCG5/8 | <i>ABCG5/8</i> | rs13396356  | T | A | 0.058 | -0.0286 | 0.0030 | 2.2E-16   | 90.5   |
| European   | Targeting ABCG5/8 | <i>ABCG5/8</i> | rs149109487 | C | G | 0.020 | -0.0414 | 0.0051 | 1.7E-12   | 66.9   |
| European   | Targeting ABCG5/8 | <i>ABCG5/8</i> | rs75841075  | A | G | 0.023 | 0.0310  | 0.0046 | 7.6E-09   | 44.8   |
| European   | Targeting ABCG5/8 | <i>ABCG5/8</i> | rs7573769   | G | A | 0.176 | -0.0181 | 0.0018 | 1.2E-17   | 98.2   |
| European   | Targeting ABCG5/8 | <i>ABCG5/8</i> | rs111859423 | C | T | 0.032 | 0.0333  | 0.0043 | 1.4E-11   | 61.3   |
| European   | Targeting ABCG5/8 | <i>ABCG5/8</i> | rs188238029 | T | A | 0.009 | 0.0514  | 0.0076 | 6.4E-09   | 45.3   |
| European   | Targeting ABCG5/8 | <i>ABCG5/8</i> | rs62135111  | A | G | 0.143 | 0.0222  | 0.0020 | 3.0E-22   | 126.4  |
| East Asian | Statins           | <i>HMGCR</i>   | rs7717415   | G | A | 0.470 | 0.0408  | 0.0052 | 4.4E-14   | 62.1   |
| East Asian | Statins           | <i>HMGCR</i>   | rs78908099  | C | T | 0.042 | 0.0851  | 0.0128 | 2.2E-10   | 43.9   |
| East Asian | Statins           | <i>HMGCR</i>   | rs77679151  | T | C | 0.053 | -0.0698 | 0.0113 | 3.7E-09   | 37.9   |
| East Asian | Statins           | <i>HMGCR</i>   | rs6453131   | T | G | 0.498 | -0.0815 | 0.0050 | 4.3E-55   | 266.3  |
| East Asian | Statins           | <i>HMGCR</i>   | rs139488631 | C | T | 0.013 | -0.1584 | 0.0253 | 1.9E-09   | 39.3   |

|            |                         |              |             |   |   |       |         |        |         |       |
|------------|-------------------------|--------------|-------------|---|---|-------|---------|--------|---------|-------|
| East Asian | PCSK9 inhibitors        | <i>PCSK9</i> | rs34232196  | T | C | 0.127 | -0.0607 | 0.0077 | 4.3E-14 | 62.1  |
| East Asian | PCSK9 inhibitors        | <i>PCSK9</i> | rs28848281  | A | G | 0.425 | -0.0354 | 0.0058 | 5.7E-09 | 37.0  |
| East Asian | PCSK9 inhibitors        | <i>PCSK9</i> | rs2495491   | T | G | 0.273 | -0.0371 | 0.0061 | 5.9E-09 | 36.9  |
| East Asian | PCSK9 inhibitors        | <i>PCSK9</i> | rs151193009 | T | C | 0.009 | -0.4860 | 0.0333 | 2.3E-44 | 212.7 |
| East Asian | PCSK9 inhibitors        | <i>PCSK9</i> | rs10888897  | T | C | 0.187 | -0.0604 | 0.0066 | 1.3E-18 | 84.6  |
| East Asian | PCSK9 inhibitors        | <i>PCSK9</i> | rs17111652  | T | C | 0.060 | 0.0763  | 0.0107 | 1.0E-11 | 50.4  |
| East Asian | PCSK9 inhibitors        | <i>PCSK9</i> | rs6663252   | C | T | 0.120 | -0.0751 | 0.0078 | 3.5E-20 | 92.2  |
| East Asian | Targeting LDL receptors | <i>LDLR</i>  | rs145960625 | A | G | 0.008 | -0.2053 | 0.0308 | 1.7E-10 | 44.4  |
| East Asian | Targeting LDL receptors | <i>LDLR</i>  | rs67475684  | T | A | 0.162 | 0.0713  | 0.0069 | 4.5E-23 | 106.6 |
| East Asian | Targeting LDL receptors | <i>LDLR</i>  | rs5927      | A | G | 0.057 | -0.0859 | 0.0116 | 1.5E-12 | 54.5  |
| East Asian | Targeting LDL receptors | <i>LDLR</i>  | rs117373926 | G | T | 0.112 | 0.0514  | 0.0085 | 6.5E-09 | 36.7  |
| East Asian | Targeting LDL receptors | <i>LDLR</i>  | rs2738464   | G | C | 0.283 | -0.1080 | 0.0059 | 8.3E-68 | 329.9 |
| East Asian | Targeting LDL receptors | <i>LDLR</i>  | rs117523171 | G | T | 0.327 | 0.0398  | 0.0067 | 1.3E-08 | 35.2  |
| East Asian | Targeting LDL receptors | <i>LDLR</i>  | rs183241760 | A | G | 0.018 | -0.1617 | 0.0200 | 9.2E-15 | 65.4  |
| East Asian | Targeting LDL receptors | <i>LDLR</i>  | rs442363    | A | G | 0.408 | 0.0371  | 0.0056 | 2.2E-10 | 43.9  |
| East Asian | Targeting LDL receptors | <i>LDLR</i>  | rs17699089  | G | A | 0.261 | -0.0620 | 0.0057 | 3.0E-25 | 117.4 |
| East Asian | Mipomersen              | <i>APOB</i>  | rs76684042  | T | A | 0.024 | 0.1263  | 0.0204 | 2.8E-09 | 38.4  |
| East Asian | Mipomersen              | <i>APOB</i>  | rs76693756  | T | C | 0.017 | 0.1183  | 0.0196 | 6.8E-09 | 36.6  |
| East Asian | Mipomersen              | <i>APOB</i>  | rs13306194  | A | G | 0.114 | -0.1235 | 0.0079 | 8.6E-51 | 244.8 |
| East Asian | Mipomersen              | <i>APOB</i>  | rs589566    | A | G | 0.216 | 0.0649  | 0.0063 | 6.0E-23 | 106.0 |
| East Asian | Mipomersen              | <i>APOB</i>  | rs528148801 | A | C | 0.009 | -0.1590 | 0.0259 | 3.8E-09 | 37.8  |

ABCG5/8, adenosine triphosphate (ATP)-binding cassette transporters G5/8; LDL, low-density lipoprotein; PCSK9, proprotein convertase subtilisin/kexin type 9.

Supplemental Table 4. SNP-specific estimates for genetic predictors for plasma LDL-cholesterol on plasma LDL-cholesterol (standard deviation) in people of European and East Asian ancestry.

| Ancestry | SNP         | Effect allele | Other allele | Effect allele frequency | Beta    | SE     | <i>P</i> value | F-statistic |
|----------|-------------|---------------|--------------|-------------------------|---------|--------|----------------|-------------|
| European | rs1123571   | A             | G            | 0.469                   | -0.0110 | 0.0014 | 3.0E-11        | 59.3        |
| European | rs1497406   | A             | G            | 0.416                   | -0.0136 | 0.0014 | 7.5E-17        | 93.4        |
| European | rs10903129  | A             | G            | 0.452                   | -0.0258 | 0.0014 | 5.2E-58        | 346.3       |
| European | rs12094989  | T             | C            | 0.215                   | -0.0129 | 0.0017 | 5.2E-11        | 57.9        |
| European | rs114165349 | C             | G            | 0.023                   | 0.0835  | 0.0046 | 8.4E-55        | 326.5       |
| European | rs8681      | A             | G            | 0.256                   | -0.0112 | 0.0016 | 1.4E-09        | 49.3        |
| European | rs213499    | C             | A            | 0.468                   | -0.0102 | 0.0014 | 3.1E-10        | 53.2        |
| European | rs374459115 | A             | G            | 0.017                   | 0.0683  | 0.0068 | 2.8E-18        | 102.2       |
| European | rs11591147  | T             | G            | 0.016                   | -0.4337 | 0.0054 | <4.9E-324      | 6388.7      |
| European | rs693668    | G             | A            | 0.359                   | -0.0565 | 0.0015 | 2.6E-243       | 1490.6      |
| European | rs11206517  | G             | T            | 0.037                   | 0.0889  | 0.0037 | 7.6E-95        | 573.4       |
| European | rs6588577   | A             | C            | 0.066                   | -0.0219 | 0.0028 | 1.9E-11        | 60.5        |
| European | rs7534572   | C             | G            | 0.329                   | -0.0429 | 0.0015 | 2.2E-127       | 774.4       |
| European | rs2391159   | T             | C            | 0.207                   | -0.0234 | 0.0017 | 6.6E-32        | 185.6       |
| European | rs35271870  | C             | T            | 0.084                   | -0.1171 | 0.0025 | <4.9E-324      | 2164.6      |
| European | rs141521383 | C             | G            | 0.023                   | 0.0374  | 0.0050 | 1.1E-10        | 55.9        |
| European | rs35358959  | A             | G            | 0.081                   | -0.1051 | 0.0026 | 7.4E-276       | 1691.7      |
| European | rs17036094  | C             | A            | 0.012                   | -0.1143 | 0.0064 | 2.4E-53        | 317.5       |
| European | rs61798348  | T             | A            | 0.019                   | -0.0345 | 0.0052 | 9.6E-09        | 44.2        |
| European | rs267733    | G             | A            | 0.156                   | -0.0187 | 0.0019 | 2.2E-17        | 96.7        |
| European | rs4390169   | A             | G            | 0.485                   | 0.0120  | 0.0014 | 8.8E-14        | 74.7        |
| European | rs115383270 | A             | G            | 0.073                   | 0.0193  | 0.0027 | 1.3E-09        | 49.4        |
| European | rs6682862   | A             | G            | 0.164                   | -0.0137 | 0.0019 | 3.4E-10        | 52.9        |
| European | rs1689801   | A             | G            | 0.325                   | 0.0144  | 0.0015 | 3.9E-17        | 95.2        |
| European | rs2296288   | T             | C            | 0.437                   | -0.0113 | 0.0014 | 3.8E-12        | 64.8        |
| European | rs1434282   | C             | T            | 0.277                   | -0.0109 | 0.0016 | 2.1E-09        | 48.2        |
| European | rs2642438   | A             | G            | 0.294                   | -0.0269 | 0.0015 | 3.2E-52        | 310.6       |
| European | rs12138866  | G             | A            | 0.040                   | -0.0240 | 0.0037 | 1.5E-08        | 43.1        |
| European | rs7544869   | A             | T            | 0.453                   | -0.0122 | 0.0014 | 7.4E-14        | 75.2        |
| European | rs553427    | C             | T            | 0.473                   | -0.0403 | 0.0014 | 7.0E-135       | 820.6       |
| European | rs10910522  | A             | G            | 0.429                   | -0.0119 | 0.0014 | 4.6E-13        | 70.3        |
| European | rs7512010   | A             | T            | 0.193                   | -0.0183 | 0.0018 | 1.6E-18        | 103.5       |

|          |             |   |   |       |         |        |           |        |
|----------|-------------|---|---|-------|---------|--------|-----------|--------|
| European | rs3935011   | C | T | 0.480 | 0.0089  | 0.0014 | 3.6E-08   | 40.7   |
| European | rs3820897   | T | C | 0.192 | 0.0159  | 0.0018 | 8.2E-15   | 81.0   |
| European | rs67269656  | T | C | 0.265 | -0.0104 | 0.0016 | 1.3E-08   | 43.5   |
| European | rs4465730   | A | G | 0.219 | 0.0146  | 0.0017 | 6.2E-14   | 75.7   |
| European | rs77370158  | G | A | 0.077 | 0.0298  | 0.0027 | 9.4E-22   | 123.4  |
| European | rs115692156 | G | A | 0.010 | -0.0749 | 0.0074 | 1.8E-18   | 103.3  |
| European | rs62122481  | A | C | 0.359 | 0.0705  | 0.0015 | <4.9E-324 | 2347.9 |
| European | rs12720796  | C | A | 0.021 | 0.0692  | 0.0049 | 6.8E-34   | 197.8  |
| European | rs72902579  | C | T | 0.038 | -0.0975 | 0.0037 | 6.6E-115  | 697.3  |
| European | rs11891554  | A | G | 0.053 | -0.0234 | 0.0032 | 2.0E-10   | 54.4   |
| European | rs2374569   | T | C | 0.369 | -0.0092 | 0.0014 | 3.8E-08   | 40.6   |
| European | rs185263492 | A | T | 0.159 | 0.0306  | 0.0020 | 1.6E-38   | 226.2  |
| European | rs4299376   | G | T | 0.309 | 0.0700  | 0.0015 | <4.9E-324 | 2155.6 |
| European | rs6709904   | G | A | 0.109 | -0.0472 | 0.0022 | 3.8E-76   | 458.0  |
| European | rs6741740   | A | G | 0.241 | 0.0130  | 0.0016 | 5.2E-12   | 64.0   |
| European | rs4671050   | T | G | 0.320 | -0.0224 | 0.0015 | 8.3E-38   | 221.9  |
| European | rs954680    | C | G | 0.298 | -0.0124 | 0.0015 | 4.2E-12   | 64.5   |
| European | rs11887443  | T | G | 0.263 | -0.0125 | 0.0018 | 9.5E-10   | 50.3   |
| European | rs2970902   | C | G | 0.342 | 0.0101  | 0.0015 | 3.1E-09   | 47.1   |
| European | rs113313551 | G | C | 0.148 | -0.0127 | 0.0020 | 2.0E-08   | 42.3   |
| European | rs1992172   | G | A | 0.194 | 0.0195  | 0.0018 | 1.1E-21   | 122.9  |
| European | rs150474434 | A | G | 0.095 | -0.0423 | 0.0024 | 4.9E-53   | 315.6  |
| European | rs17050272  | A | G | 0.421 | -0.0228 | 0.0014 | 3.2E-42   | 249.0  |
| European | rs1375131   | C | T | 0.313 | 0.0196  | 0.0017 | 1.3E-22   | 128.7  |
| European | rs12614487  | T | C | 0.074 | -0.0266 | 0.0026 | 3.0E-18   | 102.0  |
| European | rs10184004  | T | C | 0.413 | -0.0105 | 0.0014 | 1.4E-10   | 55.3   |
| European | rs10184673  | G | A | 0.405 | 0.0220  | 0.0014 | 1.4E-40   | 239.0  |
| European | rs12693968  | A | G | 0.258 | 0.0213  | 0.0016 | 1.6E-30   | 177.1  |
| European | rs3814365   | T | C | 0.443 | -0.0137 | 0.0014 | 5.7E-17   | 94.1   |
| European | rs1250259   | T | A | 0.264 | -0.0177 | 0.0016 | 1.2E-21   | 122.6  |
| European | rs78058190  | A | G | 0.052 | 0.0240  | 0.0036 | 1.0E-08   | 44.1   |
| European | rs6431630   | A | G | 0.105 | 0.0241  | 0.0023 | 2.9E-20   | 114.2  |
| European | rs146194062 | T | C | 0.012 | -0.0702 | 0.0070 | 8.1E-18   | 99.3   |
| European | rs13076933  | G | T | 0.257 | -0.0245 | 0.0016 | 6.3E-40   | 234.9  |
| European | rs6792725   | A | G | 0.319 | 0.0153  | 0.0016 | 2.9E-17   | 95.9   |
| European | rs9837622   | A | T | 0.073 | -0.0371 | 0.0027 | 2.8E-32   | 187.9  |

|          |             |   |   |       |         |        |           |        |
|----------|-------------|---|---|-------|---------|--------|-----------|--------|
| European | rs71311871  | G | A | 0.081 | -0.0380 | 0.0025 | 1.3E-38   | 226.8  |
| European | rs55921103  | G | T | 0.359 | -0.0126 | 0.0015 | 1.8E-13   | 72.8   |
| European | rs9837149   | C | G | 0.153 | 0.0189  | 0.0019 | 2.2E-17   | 96.6   |
| European | rs11719535  | C | T | 0.244 | -0.0118 | 0.0016 | 4.4E-10   | 52.3   |
| European | rs55732372  | A | G | 0.076 | 0.0174  | 0.0027 | 2.0E-08   | 42.3   |
| European | rs74341202  | A | G | 0.050 | -0.0426 | 0.0032 | 5.2E-30   | 174.0  |
| European | rs523118    | T | G | 0.211 | -0.0144 | 0.0018 | 2.2E-12   | 66.3   |
| European | rs9653945   | A | G | 0.347 | -0.0130 | 0.0015 | 1.4E-14   | 79.5   |
| European | rs6441313   | A | G | 0.463 | 0.0126  | 0.0014 | 2.0E-14   | 78.6   |
| European | rs56118251  | G | A | 0.157 | 0.0137  | 0.0019 | 4.1E-10   | 52.5   |
| European | rs13108218  | A | G | 0.385 | 0.0183  | 0.0015 | 5.2E-27   | 155.6  |
| European | rs4234798   | T | G | 0.390 | -0.0110 | 0.0014 | 2.0E-11   | 60.3   |
| European | rs79623641  | A | G | 0.068 | -0.0179 | 0.0028 | 4.4E-08   | 40.3   |
| European | rs112575086 | T | C | 0.120 | -0.0139 | 0.0021 | 1.8E-08   | 42.7   |
| European | rs146674238 | T | A | 0.014 | 0.0472  | 0.0065 | 4.9E-10   | 52.0   |
| European | rs34707604  | C | T | 0.248 | 0.0318  | 0.0019 | 1.1E-48   | 288.9  |
| European | rs149314105 | T | C | 0.028 | -0.0339 | 0.0050 | 5.2E-09   | 45.8   |
| European | rs72663045  | G | T | 0.020 | 0.0403  | 0.0050 | 5.1E-12   | 64.0   |
| European | rs342467    | T | C | 0.399 | -0.0102 | 0.0014 | 6.6E-10   | 51.2   |
| European | rs11499828  | C | T | 0.108 | 0.0165  | 0.0023 | 2.7E-10   | 53.6   |
| European | rs28497720  | T | C | 0.251 | -0.0175 | 0.0016 | 2.5E-21   | 120.8  |
| European | rs17617028  | A | G | 0.217 | 0.0133  | 0.0017 | 8.7E-12   | 62.6   |
| European | rs138204164 | G | C | 0.132 | -0.0145 | 0.0021 | 1.3E-09   | 49.5   |
| European | rs41280463  | A | G | 0.167 | -0.0152 | 0.0019 | 1.6E-12   | 67.1   |
| European | rs116692022 | G | A | 0.013 | 0.0455  | 0.0065 | 1.2E-09   | 49.7   |
| European | rs72701754  | T | A | 0.404 | 0.0092  | 0.0014 | 3.6E-08   | 40.7   |
| European | rs116734477 | T | C | 0.038 | -0.0511 | 0.0037 | 1.9E-33   | 195.1  |
| European | rs3010275   | G | T | 0.210 | -0.0183 | 0.0017 | 1.6E-20   | 115.9  |
| European | rs1423527   | A | C | 0.399 | 0.0653  | 0.0014 | <4.9E-324 | 2127.3 |
| European | rs6869845   | C | T | 0.451 | -0.0167 | 0.0014 | 5.7E-25   | 143.1  |
| European | rs2706381   | T | C | 0.196 | -0.0195 | 0.0018 | 7.0E-22   | 124.1  |
| European | rs13153174  | G | C | 0.214 | -0.0108 | 0.0017 | 3.8E-08   | 40.6   |
| European | rs11167778  | T | C | 0.107 | 0.0218  | 0.0023 | 6.2E-17   | 93.9   |
| European | rs543486395 | A | C | 0.023 | -0.0488 | 0.0060 | 2.4E-12   | 66.0   |
| European | rs12657266  | C | T | 0.365 | -0.0353 | 0.0014 | 9.0E-100  | 603.8  |
| European | rs13360569  | T | C | 0.430 | -0.0098 | 0.0014 | 2.1E-09   | 48.2   |

|          |             |   |   |       |         |        |          |        |
|----------|-------------|---|---|-------|---------|--------|----------|--------|
| European | rs352942    | A | G | 0.252 | -0.0104 | 0.0016 | 3.8E-08  | 40.6   |
| European | rs147539187 | G | C | 0.069 | -0.0231 | 0.0028 | 6.0E-13  | 69.6   |
| European | rs2235215   | C | T | 0.321 | -0.0318 | 0.0015 | 4.3E-76  | 457.7  |
| European | rs1800562   | A | G | 0.068 | -0.0572 | 0.0028 | 2.2E-71  | 428.7  |
| European | rs1061537   | A | G | 0.444 | 0.0136  | 0.0016 | 2.1E-13  | 72.4   |
| European | rs28732146  | A | T | 0.196 | 0.0140  | 0.0018 | 2.0E-11  | 60.4   |
| European | rs6689      | G | A | 0.203 | 0.0390  | 0.0019 | 2.0E-70  | 422.8  |
| European | rs114863007 | A | G | 0.097 | -0.0267 | 0.0024 | 1.1E-22  | 129.0  |
| European | rs62406547  | C | A | 0.496 | -0.0128 | 0.0016 | 1.1E-12  | 68.0   |
| European | rs17665178  | G | C | 0.302 | -0.0159 | 0.0016 | 1.6E-18  | 103.6  |
| European | rs12662589  | C | G | 0.259 | 0.0153  | 0.0016 | 7.8E-17  | 93.3   |
| European | rs9496567   | A | G | 0.236 | -0.0210 | 0.0016 | 3.4E-28  | 162.8  |
| European | rs62419249  | A | G | 0.478 | 0.0121  | 0.0014 | 1.0E-13  | 74.3   |
| European | rs4946713   | A | C | 0.447 | -0.0112 | 0.0014 | 4.9E-12  | 64.1   |
| European | rs1556857   | C | T | 0.407 | -0.0169 | 0.0014 | 4.4E-25  | 143.7  |
| European | rs72971192  | C | T | 0.235 | -0.0118 | 0.0017 | 1.4E-09  | 49.3   |
| European | rs141783576 | C | G | 0.069 | 0.0240  | 0.0031 | 1.5E-11  | 61.2   |
| European | rs9399137   | C | T | 0.262 | -0.0256 | 0.0016 | 4.4E-44  | 260.5  |
| European | rs76933614  | C | T | 0.077 | 0.0232  | 0.0027 | 7.4E-14  | 75.2   |
| European | rs112170089 | A | G | 0.018 | 0.0521  | 0.0059 | 3.6E-14  | 77.1   |
| European | rs12208357  | T | C | 0.070 | 0.0645  | 0.0027 | 1.9E-94  | 571.0  |
| European | rs146534110 | T | G | 0.012 | 0.0761  | 0.0066 | 4.9E-23  | 131.2  |
| European | rs144833821 | C | T | 0.009 | -0.0498 | 0.0076 | 1.6E-08  | 42.9   |
| European | rs117733303 | G | A | 0.018 | 0.1453  | 0.0053 | 1.2E-123 | 751.2  |
| European | rs10455872  | G | A | 0.069 | 0.1138  | 0.0027 | 3.2E-281 | 1724.9 |
| European | rs12055389  | T | C | 0.057 | -0.0278 | 0.0030 | 1.6E-15  | 85.3   |
| European | rs10272002  | G | A | 0.210 | -0.0223 | 0.0017 | 2.9E-29  | 169.4  |
| European | rs34927723  | T | C | 0.157 | -0.0134 | 0.0019 | 2.3E-09  | 48.0   |
| European | rs55696093  | G | A | 0.211 | 0.0382  | 0.0017 | 3.1E-83  | 501.8  |
| European | rs896311    | G | A | 0.300 | -0.0166 | 0.0015 | 7.4E-21  | 117.9  |
| European | rs56001710  | A | T | 0.423 | -0.0137 | 0.0017 | 7.1E-12  | 63.1   |
| European | rs12533280  | T | C | 0.195 | 0.0180  | 0.0018 | 9.4E-19  | 105.0  |
| European | rs7808613   | G | C | 0.245 | 0.0113  | 0.0016 | 2.7E-09  | 47.6   |
| European | rs17725246  | C | T | 0.195 | 0.0428  | 0.0018 | 1.3E-94  | 572.0  |
| European | rs799157    | T | C | 0.036 | 0.0318  | 0.0039 | 1.4E-12  | 67.3   |
| European | rs1057868   | T | C | 0.288 | 0.0115  | 0.0015 | 7.7E-11  | 56.9   |

|          |             |   |   |       |         |        |           |        |
|----------|-------------|---|---|-------|---------|--------|-----------|--------|
| European | rs1014283   | A | C | 0.183 | -0.0136 | 0.0018 | 6.1E-11   | 57.5   |
| European | rs6967728   | A | G | 0.183 | -0.0179 | 0.0018 | 3.5E-17   | 95.4   |
| European | rs564449    | T | G | 0.115 | 0.0267  | 0.0022 | 3.9E-26   | 150.2  |
| European | rs1838931   | T | C | 0.312 | 0.0113  | 0.0015 | 1.5E-10   | 55.2   |
| European | rs4374942   | C | T | 0.081 | 0.0200  | 0.0026 | 1.6E-11   | 61.1   |
| European | rs2936512   | T | C | 0.326 | -0.0119 | 0.0015 | 4.0E-12   | 64.6   |
| European | rs9987289   | A | G | 0.092 | -0.0599 | 0.0024 | 1.6E-103  | 627.1  |
| European | rs10108282  | A | T | 0.212 | 0.0139  | 0.0017 | 2.3E-12   | 66.1   |
| European | rs13255048  | A | G | 0.141 | 0.0210  | 0.0020 | 9.6E-20   | 111.1  |
| European | rs151150389 | C | T | 0.034 | 0.0298  | 0.0038 | 1.9E-11   | 60.5   |
| European | rs117139027 | A | G | 0.013 | -0.0783 | 0.0064 | 7.3E-26   | 148.5  |
| European | rs28615248  | C | T | 0.196 | 0.0244  | 0.0018 | 4.0E-33   | 193.1  |
| European | rs9297994   | G | A | 0.338 | 0.0355  | 0.0015 | 4.0E-97   | 587.5  |
| European | rs12114596  | T | C | 0.347 | 0.0117  | 0.0016 | 3.4E-10   | 53.0   |
| European | rs62509311  | T | A | 0.279 | -0.0153 | 0.0016 | 3.4E-17   | 95.5   |
| European | rs2737245   | T | G | 0.277 | -0.0254 | 0.0016 | 3.2E-45   | 267.5  |
| European | rs13249867  | T | G | 0.136 | -0.0207 | 0.0027 | 2.7E-11   | 59.6   |
| European | rs28601761  | G | C | 0.422 | -0.0649 | 0.0014 | <4.9E-324 | 2092.2 |
| European | rs11787335  | T | C | 0.355 | 0.0231  | 0.0015 | 3.8E-42   | 248.6  |
| European | rs3780181   | G | A | 0.070 | -0.0359 | 0.0028 | 3.8E-29   | 168.7  |
| European | rs28498684  | A | G | 0.400 | 0.0132  | 0.0014 | 1.3E-15   | 85.8   |
| European | rs12551960  | T | C | 0.079 | 0.0350  | 0.0026 | 4.3E-30   | 174.5  |
| European | rs7864568   | A | G | 0.316 | -0.0156 | 0.0016 | 7.4E-18   | 99.6   |
| European | rs1571791   | T | C | 0.380 | 0.0139  | 0.0014 | 8.1E-17   | 93.2   |
| European | rs9410207   | C | T | 0.066 | -0.0200 | 0.0028 | 9.8E-10   | 50.2   |
| European | rs2066714   | C | T | 0.124 | 0.0190  | 0.0021 | 5.2E-15   | 82.2   |
| European | rs11789603  | T | C | 0.101 | 0.0236  | 0.0023 | 2.2E-18   | 102.7  |
| European | rs2740488   | C | A | 0.261 | -0.0249 | 0.0016 | 4.6E-42   | 248.1  |
| European | rs56294298  | A | G | 0.085 | -0.0183 | 0.0026 | 1.4E-09   | 49.2   |
| European | rs6478851   | A | G | 0.236 | -0.0132 | 0.0016 | 4.1E-12   | 64.5   |
| European | rs2519093   | T | C | 0.188 | 0.0724  | 0.0018 | 5.8E-278  | 1704.7 |
| European | rs76643124  | A | G | 0.024 | -0.0289 | 0.0045 | 3.0E-08   | 41.3   |
| European | rs13301660  | T | C | 0.270 | -0.0156 | 0.0016 | 8.2E-18   | 99.3   |
| European | rs7903259   | G | C | 0.416 | 0.0163  | 0.0014 | 4.3E-23   | 131.6  |
| European | rs1896995   | C | T | 0.498 | -0.0122 | 0.0014 | 8.7E-14   | 74.7   |
| European | rs17476364  | C | T | 0.099 | -0.0268 | 0.0023 | 3.0E-23   | 132.5  |



|          |             |   |   |       |         |        |          |       |
|----------|-------------|---|---|-------|---------|--------|----------|-------|
| European | rs1870140   | A | G | 0.157 | -0.0125 | 0.0019 | 2.2E-08  | 42.0  |
| European | rs2068888   | A | G | 0.451 | -0.0180 | 0.0014 | 7.3E-29  | 166.9 |
| European | rs61886346  | T | C | 0.061 | -0.0192 | 0.0029 | 1.2E-08  | 43.6  |
| European | rs603424    | A | G | 0.169 | 0.0159  | 0.0019 | 3.7E-13  | 70.9  |
| European | rs2792751   | T | C | 0.281 | 0.0239  | 0.0015 | 2.7E-41  | 243.3 |
| European | rs60847460  | T | C | 0.140 | -0.0182 | 0.0020 | 3.5E-15  | 83.2  |
| European | rs2301179   | A | G | 0.492 | -0.0159 | 0.0014 | 8.2E-23  | 129.8 |
| European | rs7904973   | G | T | 0.424 | -0.0210 | 0.0014 | 7.0E-38  | 222.4 |
| European | rs7124487   | T | C | 0.186 | -0.0116 | 0.0018 | 4.1E-08  | 40.4  |
| European | rs7108486   | C | T | 0.024 | -0.0322 | 0.0046 | 1.3E-09  | 49.4  |
| European | rs12271333  | C | A | 0.134 | 0.0165  | 0.0020 | 2.7E-12  | 65.7  |
| European | rs11601507  | A | C | 0.070 | 0.0404  | 0.0032 | 4.8E-28  | 161.9 |
| European | rs10832956  | T | C | 0.272 | -0.0208 | 0.0016 | 1.0E-30  | 178.4 |
| European | rs61882680  | T | C | 0.030 | -0.0280 | 0.0041 | 4.3E-09  | 46.3  |
| European | rs174547    | C | T | 0.346 | -0.0429 | 0.0015 | 6.4E-143 | 870.3 |
| European | rs77631946  | A | C | 0.093 | -0.0187 | 0.0025 | 5.2E-11  | 57.9  |
| European | rs1638586   | A | G | 0.080 | -0.0196 | 0.0026 | 5.2E-11  | 57.9  |
| European | rs78643851  | T | G | 0.021 | 0.0348  | 0.0054 | 2.5E-08  | 41.7  |
| European | rs11226108  | C | G | 0.191 | -0.0143 | 0.0018 | 7.9E-12  | 62.8  |
| European | rs964184    | G | C | 0.135 | 0.0552  | 0.0020 | 3.5E-123 | 748.4 |
| European | rs141469619 | G | A | 0.009 | 0.0725  | 0.0080 | 3.8E-15  | 83.0  |
| European | rs12970     | A | G | 0.061 | -0.0268 | 0.0029 | 1.6E-15  | 85.4  |
| European | rs4307732   | A | G | 0.108 | 0.0480  | 0.0022 | 7.9E-78  | 468.5 |
| European | rs35882350  | G | A | 0.256 | 0.0182  | 0.0016 | 5.4E-22  | 124.8 |
| European | rs117233107 | A | G | 0.015 | -0.0459 | 0.0060 | 3.7E-11  | 58.8  |
| European | rs75667995  | C | T | 0.068 | -0.0291 | 0.0027 | 3.4E-20  | 113.9 |
| European | rs11175540  | A | T | 0.066 | 0.0261  | 0.0028 | 2.7E-15  | 83.9  |
| European | rs2250751   | A | G | 0.341 | -0.0165 | 0.0015 | 4.7E-22  | 125.2 |
| European | rs7300192   | A | G | 0.365 | 0.0135  | 0.0015 | 2.5E-15  | 84.1  |
| European | rs74090765  | G | T | 0.173 | 0.0145  | 0.0018 | 1.0E-11  | 62.2  |
| European | rs61754230  | T | C | 0.016 | 0.0491  | 0.0057 | 1.6E-13  | 73.2  |
| European | rs12306780  | T | A | 0.342 | 0.0116  | 0.0015 | 9.8E-12  | 62.3  |
| European | rs1515565   | A | G | 0.482 | -0.0093 | 0.0014 | 9.0E-09  | 44.4  |
| European | rs11837065  | T | C | 0.366 | -0.0111 | 0.0015 | 7.2E-11  | 57.0  |
| European | rs3184504   | T | C | 0.473 | -0.0234 | 0.0014 | 1.3E-47  | 282.2 |
| European | rs1169288   | C | A | 0.322 | 0.0359  | 0.0015 | 1.1E-95  | 578.7 |

|          |             |   |   |       |         |        |          |        |
|----------|-------------|---|---|-------|---------|--------|----------|--------|
| European | rs2247139   | A | G | 0.132 | 0.0132  | 0.0020 | 2.4E-08  | 41.8   |
| European | rs2451322   | G | A | 0.405 | -0.0106 | 0.0014 | 1.1E-10  | 55.9   |
| European | rs11057841  | T | C | 0.141 | 0.0219  | 0.0020 | 9.0E-21  | 117.3  |
| European | rs75588192  | A | G | 0.140 | 0.0165  | 0.0021 | 2.2E-11  | 60.2   |
| European | rs7327867   | G | A | 0.474 | 0.0199  | 0.0014 | 1.4E-34  | 202.1  |
| European | rs208432    | C | T | 0.386 | 0.0107  | 0.0014 | 1.3E-10  | 55.4   |
| European | rs17532371  | G | C | 0.071 | -0.0194 | 0.0027 | 7.3E-10  | 50.9   |
| European | rs9592980   | G | A | 0.415 | -0.0095 | 0.0014 | 8.0E-09  | 44.7   |
| European | rs7330899   | A | G | 0.244 | 0.0143  | 0.0016 | 1.8E-14  | 79.0   |
| European | rs551473284 | T | C | 0.366 | -0.0152 | 0.0017 | 3.4E-15  | 83.3   |
| European | rs6602909   | C | T | 0.330 | 0.0212  | 0.0015 | 1.3E-33  | 196.1  |
| European | rs12016920  | C | T | 0.193 | -0.0172 | 0.0018 | 2.0E-16  | 90.8   |
| European | rs11621792  | T | C | 0.449 | 0.0220  | 0.0014 | 1.6E-40  | 238.6  |
| European | rs11846704  | T | C | 0.267 | -0.0138 | 0.0016 | 3.4E-14  | 77.2   |
| European | rs17101394  | A | G | 0.160 | 0.0154  | 0.0019 | 3.4E-12  | 65.1   |
| European | rs7157399   | T | C | 0.140 | -0.0254 | 0.0020 | 8.8E-28  | 160.3  |
| European | rs13379043  | C | T | 0.271 | -0.0165 | 0.0016 | 9.1E-20  | 111.2  |
| European | rs34752362  | A | G | 0.443 | -0.0096 | 0.0014 | 3.9E-09  | 46.6   |
| European | rs17776811  | A | C | 0.397 | 0.0094  | 0.0014 | 1.2E-08  | 43.6   |
| European | rs28929474  | T | C | 0.018 | 0.0528  | 0.0052 | 1.6E-18  | 103.6  |
| European | rs17580     | A | T | 0.039 | 0.0498  | 0.0036 | 1.3E-32  | 189.9  |
| European | rs28375625  | A | C | 0.461 | -0.0091 | 0.0014 | 2.4E-08  | 41.9   |
| European | rs79391862  | C | A | 0.020 | -0.0639 | 0.0053 | 3.8E-25  | 144.2  |
| European | rs148086620 | G | A | 0.042 | 0.0297  | 0.0035 | 4.6E-13  | 70.3   |
| European | rs686958    | T | A | 0.181 | 0.0115  | 0.0018 | 4.0E-08  | 40.5   |
| European | rs11636087  | C | T | 0.298 | 0.0144  | 0.0015 | 9.5E-16  | 86.7   |
| European | rs12917376  | C | T | 0.423 | -0.0126 | 0.0014 | 2.2E-14  | 78.3   |
| European | rs8029797   | A | T | 0.313 | -0.0095 | 0.0015 | 4.0E-08  | 40.5   |
| European | rs12445804  | A | G | 0.076 | 0.0326  | 0.0027 | 1.0E-25  | 147.7  |
| European | rs35468353  | G | A | 0.377 | 0.0119  | 0.0014 | 7.8E-13  | 68.9   |
| European | rs247617    | A | C | 0.321 | -0.0367 | 0.0015 | 3.5E-101 | 612.5  |
| European | rs4788817   | C | T | 0.378 | 0.0118  | 0.0014 | 2.3E-12  | 66.1   |
| European | rs34042070  | G | C | 0.191 | 0.0573  | 0.0018 | 8.5E-173 | 1054.8 |
| European | rs7202323   | G | T | 0.228 | -0.0229 | 0.0017 | 1.8E-32  | 189.1  |
| European | rs7404072   | C | T | 0.286 | -0.0103 | 0.0016 | 1.0E-08  | 44.0   |
| European | rs67890964  | C | T | 0.381 | -0.0183 | 0.0015 | 1.3E-26  | 153.2  |

|          |             |   |   |       |         |        |           |        |
|----------|-------------|---|---|-------|---------|--------|-----------|--------|
| European | rs539705186 | G | T | 0.083 | 0.0209  | 0.0030 | 3.0E-09   | 47.3   |
| European | rs55714927  | T | C | 0.189 | -0.0349 | 0.0018 | 8.3E-61   | 363.5  |
| European | rs150688657 | A | G | 0.103 | 0.0216  | 0.0023 | 9.3E-16   | 86.7   |
| European | rs28811342  | C | T | 0.197 | 0.0126  | 0.0017 | 5.5E-10   | 51.7   |
| European | rs704       | A | G | 0.477 | 0.0189  | 0.0014 | 1.0E-31   | 184.5  |
| European | rs117765227 | T | C | 0.029 | -0.0311 | 0.0042 | 1.0E-10   | 56.1   |
| European | rs62070652  | T | C | 0.266 | 0.0134  | 0.0016 | 2.0E-13   | 72.5   |
| European | rs525767    | A | G | 0.346 | 0.0098  | 0.0015 | 7.2E-09   | 45.0   |
| European | rs12943633  | T | C | 0.081 | -0.0178 | 0.0026 | 2.0E-09   | 48.4   |
| European | rs12949918  | C | T | 0.427 | 0.0089  | 0.0014 | 4.2E-08   | 40.4   |
| European | rs72836561  | T | C | 0.030 | -0.0298 | 0.0040 | 2.1E-10   | 54.2   |
| European | rs12603290  | T | C | 0.495 | 0.0268  | 0.0014 | 4.1E-58   | 346.9  |
| European | rs1292069   | C | T | 0.454 | -0.0098 | 0.0014 | 1.4E-09   | 49.2   |
| European | rs1801689   | C | A | 0.026 | 0.0908  | 0.0043 | 1.5E-74   | 448.3  |
| European | rs78186330  | A | G | 0.208 | 0.0163  | 0.0018 | 1.4E-15   | 85.6   |
| European | rs77542162  | G | A | 0.020 | 0.1831  | 0.0051 | 4.8E-212  | 1297.3 |
| European | rs72631343  | G | C | 0.130 | -0.0439 | 0.0021 | 3.7E-75   | 452.0  |
| European | rs2125345   | C | T | 0.292 | -0.0167 | 0.0015 | 4.0E-21   | 119.5  |
| European | rs12451056  | T | C | 0.144 | -0.0189 | 0.0020 | 9.8E-17   | 92.7   |
| European | rs2840354   | T | C | 0.191 | 0.0116  | 0.0018 | 2.0E-08   | 42.3   |
| European | rs77960347  | G | A | 0.013 | 0.0699  | 0.0062 | 2.2E-22   | 127.3  |
| European | rs10438978  | T | C | 0.180 | -0.0178 | 0.0018 | 2.9E-17   | 95.9   |
| European | rs12968116  | T | C | 0.126 | 0.0142  | 0.0021 | 4.9E-09   | 46.0   |
| European | rs1135908   | T | G | 0.146 | 0.0131  | 0.0020 | 2.0E-08   | 42.4   |
| European | rs4807570   | A | G | 0.210 | -0.0115 | 0.0017 | 5.8E-09   | 45.5   |
| European | rs112313064 | C | T | 0.370 | 0.0099  | 0.0016 | 3.6E-08   | 40.8   |
| European | rs1808664   | G | A | 0.394 | 0.0236  | 0.0014 | 5.3E-45   | 266.2  |
| European | rs73015007  | A | G | 0.241 | -0.0757 | 0.0016 | <4.9E-324 | 2127.3 |
| European | rs11670740  | G | A | 0.234 | -0.0266 | 0.0017 | 2.0E-43   | 256.5  |
| European | rs440677    | G | A | 0.381 | 0.0209  | 0.0015 | 5.5E-35   | 204.5  |
| European | rs62120366  | A | C | 0.350 | 0.0096  | 0.0015 | 1.4E-08   | 43.3   |
| European | rs150057262 | G | C | 0.011 | -0.1627 | 0.0073 | 7.1E-82   | 493.4  |
| European | rs17217098  | A | G | 0.067 | -0.0984 | 0.0028 | 7.0E-204  | 1246.9 |
| European | rs147791730 | A | G | 0.028 | -0.0291 | 0.0042 | 1.9E-09   | 48.5   |
| European | rs78242215  | A | G | 0.056 | -0.0207 | 0.0030 | 4.2E-09   | 46.4   |
| European | rs62119267  | C | A | 0.021 | -0.2248 | 0.0049 | <4.9E-324 | 2082.2 |

|          |             |   |   |       |         |        |           |        |
|----------|-------------|---|---|-------|---------|--------|-----------|--------|
| European | rs531660643 | T | G | 0.019 | -0.3927 | 0.0057 | <4.9E-324 | 4799.6 |
| European | rs140365836 | A | G | 0.006 | 0.1277  | 0.0125 | 1.2E-18   | 104.4  |
| European | rs10426226  | A | G | 0.042 | -0.0311 | 0.0035 | 3.2E-14   | 77.4   |
| European | rs113330691 | A | G | 0.034 | -0.2232 | 0.0038 | <4.9E-324 | 3405.3 |
| European | rs148601586 | G | C | 0.012 | 0.1617  | 0.0067 | 7.0E-97   | 586.0  |
| European | rs41289514  | G | A | 0.010 | 0.2509  | 0.0071 | 7.8E-204  | 1246.6 |
| European | rs72654437  | A | G | 0.030 | 0.0626  | 0.0045 | 6.6E-33   | 191.8  |
| European | rs12691088  | A | G | 0.026 | 0.1779  | 0.0047 | 3.5E-231  | 1415.6 |
| European | rs150554721 | T | C | 0.019 | -0.0384 | 0.0054 | 8.5E-10   | 50.6   |
| European | rs4803818   | T | C | 0.025 | 0.0291  | 0.0045 | 2.9E-08   | 41.3   |
| European | rs2617801   | C | G | 0.401 | 0.0215  | 0.0015 | 3.9E-36   | 211.6  |
| European | rs144794875 | G | A | 0.142 | -0.0177 | 0.0023 | 3.2E-11   | 59.1   |
| European | rs35081008  | T | C | 0.155 | -0.0309 | 0.0019 | 2.9E-43   | 255.5  |
| European | rs11673465  | C | T | 0.210 | 0.0163  | 0.0017 | 7.0E-16   | 87.5   |
| European | rs73075609  | T | C | 0.024 | 0.0479  | 0.0048 | 3.3E-18   | 101.7  |
| European | rs969075    | T | C | 0.335 | -0.0147 | 0.0015 | 2.2E-17   | 96.6   |
| European | rs2618566   | G | T | 0.339 | 0.0402  | 0.0015 | 1.1E-116  | 708.2  |
| European | rs1044573   | G | A | 0.495 | 0.0103  | 0.0014 | 3.1E-10   | 53.2   |
| European | rs224424    | G | A | 0.215 | -0.0235 | 0.0017 | 3.3E-33   | 193.6  |
| European | rs1883711   | C | G | 0.032 | 0.1308  | 0.0042 | 6.3E-161  | 981.5  |
| European | rs35570186  | A | G | 0.038 | 0.0264  | 0.0039 | 7.0E-09   | 45.0   |
| European | rs6093446   | A | G | 0.275 | 0.0242  | 0.0016 | 8.3E-41   | 240.3  |
| European | rs1800961   | T | C | 0.034 | -0.0549 | 0.0039 | 7.6E-35   | 203.7  |
| European | rs389877    | G | C | 0.191 | -0.0122 | 0.0018 | 8.0E-09   | 44.7   |
| European | rs1569750   | G | A | 0.306 | 0.0113  | 0.0015 | 2.2E-10   | 54.1   |
| European | rs6022851   | T | C | 0.446 | 0.0116  | 0.0014 | 2.3E-12   | 66.1   |
| European | rs117590445 | T | C | 0.016 | -0.0379 | 0.0059 | 2.6E-08   | 41.6   |
| European | rs2257885   | A | G | 0.247 | 0.0123  | 0.0016 | 6.6E-11   | 57.3   |
| European | rs6090040   | A | C | 0.483 | 0.0143  | 0.0015 | 4.8E-17   | 94.6   |
| European | rs73147887  | G | C | 0.212 | 0.0159  | 0.0018 | 1.9E-14   | 78.7   |
| European | rs12106385  | A | T | 0.019 | -0.0364 | 0.0055 | 1.2E-08   | 43.6   |
| European | rs112244600 | T | C | 0.051 | 0.0301  | 0.0036 | 3.1E-13   | 71.4   |
| European | rs1963676   | C | T | 0.424 | -0.0144 | 0.0014 | 4.2E-18   | 101.1  |
| European | rs5746498   | C | T | 0.238 | 0.0133  | 0.0017 | 1.4E-11   | 61.4   |
| European | rs8139142   | C | T | 0.200 | -0.0135 | 0.0020 | 7.9E-09   | 44.7   |
| European | rs5752963   | A | G | 0.037 | 0.0268  | 0.0037 | 2.7E-10   | 53.6   |

|            |             |   |   |       |         |        |         |       |
|------------|-------------|---|---|-------|---------|--------|---------|-------|
| European   | rs5755688   | A | G | 0.359 | 0.0137  | 0.0015 | 5.6E-16 | 88.1  |
| European   | rs138352    | T | G | 0.346 | 0.0138  | 0.0015 | 7.6E-16 | 87.3  |
| European   | rs9615108   | C | G | 0.387 | -0.0098 | 0.0014 | 5.6E-09 | 45.6  |
| European   | rs13268     | G | A | 0.024 | -0.0380 | 0.0045 | 4.4E-13 | 70.4  |
| East Asian | rs151193009 | T | C | 0.009 | -0.4860 | 0.0333 | 2.3E-44 | 212.7 |
| East Asian | rs72911441  | G | A | 0.054 | 0.0773  | 0.0111 | 2.5E-11 | 48.5  |
| East Asian | rs6663252   | C | T | 0.120 | -0.0751 | 0.0078 | 3.5E-20 | 92.2  |
| East Asian | rs602633    | T | G | 0.066 | -0.1919 | 0.0104 | 2.4E-69 | 337.6 |
| East Asian | rs2642438   | A | G | 0.177 | -0.0509 | 0.0068 | 8.9E-13 | 55.7  |
| East Asian | rs11320208  | A | C | 0.256 | -0.0402 | 0.0057 | 1.4E-11 | 49.8  |
| East Asian | rs13306194  | A | G | 0.114 | -0.1235 | 0.0079 | 8.6E-51 | 244.8 |
| East Asian | rs62133263  | C | G | 0.076 | 0.0696  | 0.0095 | 2.0E-12 | 53.9  |
| East Asian | rs2539981   | T | C | 0.328 | -0.0373 | 0.0055 | 7.6E-11 | 46.2  |
| East Asian | rs6741916   | T | A | 0.271 | -0.0414 | 0.0063 | 3.8E-10 | 42.7  |
| East Asian | rs3752442   | G | A | 0.453 | -0.0330 | 0.0054 | 4.7E-09 | 37.4  |
| East Asian | rs6453131   | T | G | 0.498 | -0.0815 | 0.0050 | 4.3E-55 | 266.3 |
| East Asian | rs6874202   | T | C | 0.253 | -0.0557 | 0.0058 | 2.3E-20 | 93.2  |
| East Asian | rs9376090   | C | T | 0.280 | -0.0398 | 0.0057 | 2.6E-11 | 48.4  |
| East Asian | rs73596816  | A | G | 0.032 | 0.1160  | 0.0141 | 2.8E-15 | 68.0  |
| East Asian | rs188951644 | A | T | 0.003 | 0.3689  | 0.0506 | 2.8E-12 | 53.2  |
| East Asian | rs7789194   | T | C | 0.421 | 0.0430  | 0.0055 | 9.3E-14 | 60.5  |
| East Asian | rs2054345   | C | T | 0.012 | -0.1352 | 0.0236 | 4.2E-08 | 32.7  |
| East Asian | rs112784971 | T | C | 0.244 | -0.0363 | 0.0059 | 2.8E-09 | 38.5  |
| East Asian | rs2954027   | T | A | 0.451 | 0.0432  | 0.0051 | 3.5E-16 | 72.4  |
| East Asian | rs1883025   | T | C | 0.234 | -0.0397 | 0.0059 | 9.8E-11 | 45.6  |
| East Asian | rs59857465  | A | G | 0.076 | 0.0563  | 0.0098 | 3.9E-08 | 32.9  |
| East Asian | rs2519093   | T | C | 0.216 | 0.0860  | 0.0060 | 1.1E-42 | 204.3 |
| East Asian | rs7898735   | C | T | 0.238 | -0.0578 | 0.0061 | 1.8E-19 | 88.8  |
| East Asian | rs2419607   | G | T | 0.403 | -0.0366 | 0.0052 | 1.0E-11 | 50.4  |
| East Asian | rs11601507  | A | C | 0.084 | 0.0597  | 0.0093 | 6.8E-10 | 41.5  |
| East Asian | rs174559    | A | G | 0.410 | -0.0358 | 0.0056 | 8.9E-10 | 40.9  |
| East Asian | rs59379014  | T | C | 0.094 | 0.0538  | 0.0088 | 5.0E-09 | 37.3  |
| East Asian | rs12229026  | C | T | 0.282 | 0.0347  | 0.0057 | 6.0E-09 | 36.9  |
| East Asian | rs4646776   | C | G | 0.195 | 0.0390  | 0.0064 | 6.4E-09 | 36.7  |
| East Asian | rs11571836  | G | A | 0.376 | -0.0429 | 0.0052 | 4.4E-15 | 67.0  |
| East Asian | rs7140110   | C | T | 0.217 | 0.0430  | 0.0067 | 9.9E-10 | 40.7  |

|            |             |   |   |       |         |        |           |        |
|------------|-------------|---|---|-------|---------|--------|-----------|--------|
| East Asian | rs6493583   | G | C | 0.174 | -0.0410 | 0.0069 | 1.6E-08   | 34.8   |
| East Asian | rs77303550  | T | C | 0.244 | -0.0895 | 0.0064 | 5.3E-41   | 195.9  |
| East Asian | rs7212349   | T | C | 0.274 | -0.0340 | 0.0058 | 1.4E-08   | 35.0   |
| East Asian | rs62074055  | C | G | 0.332 | 0.0382  | 0.0055 | 2.6E-11   | 48.4   |
| East Asian | rs12162136  | G | A | 0.400 | 0.0341  | 0.0051 | 1.4E-10   | 44.9   |
| East Asian | rs2738464   | G | C | 0.283 | -0.1080 | 0.0059 | 8.3E-68   | 329.9  |
| East Asian | rs737337    | C | T | 0.265 | -0.0619 | 0.0059 | 5.0E-24   | 111.3  |
| East Asian | rs11668738  | G | T | 0.421 | -0.0445 | 0.0060 | 1.7E-12   | 54.2   |
| East Asian | rs7254892   | A | G | 0.053 | -0.5976 | 0.0126 | <4.9E-324 | 2241.5 |
| East Asian | rs187976859 | C | A | 0.005 | -0.3052 | 0.0400 | 2.6E-13   | 58.3   |
| East Asian | rs5758600   | T | G | 0.433 | 0.0439  | 0.0057 | 1.2E-13   | 59.9   |

---

LDL, low-density lipoprotein.

Supplemental Table 5. Variance in plasma LDL-cholesterol explained by SNPs for each therapy and plasma LDL-cholesterol in people of European and East Asian ancestry.

| Ancestry   | Exposure                | Gene              | Number of SNPs | Variance explained |
|------------|-------------------------|-------------------|----------------|--------------------|
| European   | Statins                 | <i>HMGCR</i>      | 21             | 0.5%               |
| European   | PCSK9 inhibitors        | <i>PCSK9</i>      | 33             | 1.5%               |
| European   | Ezetimibe               | <i>NPC1L1</i>     | 6              | 0.1%               |
| European   | Targeting LDL receptors | <i>LDLR</i>       | 42             | 2.4%               |
| European   | Mipomersen              | <i>APOB</i>       | 25             | 1.7%               |
| European   | Targeting ABCG5/8       | <i>ABCG5/8</i>    | 25             | 0.7%               |
| European   | Plasma LDL-cholesterol  | Across the genome | 324            | 8.7%               |
| East Asian | Statins                 | <i>HMGCR</i>      | 5              | 0.6%               |
| East Asian | PCSK9 inhibitors        | <i>PCSK9</i>      | 7              | 0.9%               |
| East Asian | Targeting LDL receptors | <i>LDLR</i>       | 9              | 1.2%               |
| East Asian | Mipomersen              | <i>APOB</i>       | 5              | 0.6%               |
| East Asian | Plasma LDL-cholesterol  | Across the genome | 43             | 8.6%               |

ABCG5/8, adenosine triphosphate (ATP)-binding cassette transporters G5/8; LDL, low-density lipoprotein; PCSK9, proprotein convertase subtilisin/kexin type 9.

Supplemental Table 6. SNPs associated with common confounders at genome-wide significant level ( $p$  value  $<5.0E-8$ ) in PhenoScanner.

| SNP        | Trait                                              | Author  | Study/PMID | Ancestry   | $P$ value |
|------------|----------------------------------------------------|---------|------------|------------|-----------|
| rs11499828 | Alcohol intake frequency                           | Neale B | UK Biobank | European   | 3.8E-17   |
| rs174547   | Average weekly champagne<br>plus white wine intake | Neale B | UK Biobank | European   | 2.6E-08   |
| rs3184504  | Past tobacco smoking                               | Neale B | UK Biobank | European   | 5.5E-11   |
| rs3184504  | Smoking status: previous                           | Neale B | UK Biobank | European   | 6.2E-10   |
| rs4646776  | Alcohol consumption                                | Yang X  | 23364009   | East Asian | 5.2E-35   |



Supplemental Table 7. Colocalization estimates for each posterior probability using prior probabilities 1.0E-4 for a variant associated with plasma LDL-cholesterol, 1.0E-4 for a variant associated with gallstone disease, and 1.0E-5 for a variant associated with both traits in or near (+/-100kb) the target gene of each therapy.

| Therapy           | Gene           | Biobank    | SNPs | H <sub>0</sub> | H <sub>1</sub> | H <sub>2</sub> | H <sub>3</sub> | H <sub>4</sub> | Conditional H <sub>4</sub> |
|-------------------|----------------|------------|------|----------------|----------------|----------------|----------------|----------------|----------------------------|
| Statins           | <i>HMGCR</i>   | FinnGen    | 877  | <0.001         | 0.001          | <0.001         | 0.012          | 0.987          | 0.988                      |
| PCSK9 inhibitors  | <i>PCSK9</i>   | UK Biobank | 1298 | <0.001         | 0.912          | <0.001         | 0.057          | 0.031          | 0.352                      |
| Mipomersen        | <i>APOB</i>    | UK Biobank | 1085 | <0.001         | 0.504          | <0.001         | 0.447          | 0.049          | 0.099                      |
| Mipomersen        | <i>APOB</i>    | FinnGen    | 930  | <0.001         | 0.944          | <0.001         | 0.042          | 0.014          | 0.247                      |
| Targeting ABCG5/8 | <i>ABCG5/8</i> | UK Biobank | 1862 | <0.001         | <0.001         | <0.001         | >0.999         | <0.001         | <0.001                     |
| Targeting ABCG5/8 | <i>ABCG5/8</i> | FinnGen    | 1389 | <0.001         | <0.001         | <0.001         | >0.999         | <0.001         | <0.001                     |

ABCG5/8, adenosine triphosphate (ATP)-binding cassette transporters G5/8; LDL, low-density lipoprotein; PCSK9, proprotein convertase subtilisin/kexin type 9. H<sub>0</sub>, no association with either trait; H<sub>1</sub>, association with plasma LDL-cholesterol only; H<sub>2</sub>, association with gallstone disease only; H<sub>3</sub>, associations of two independent variants and one for each trait; H<sub>4</sub>, associations of one shared variant with both traits; conditional H<sub>4</sub>, associations of one shared variant with both traits conditional on the presence of a variant associated with gallstone disease ( $H_4/(H_2+H_3+H_4)$ ).

Supplemental Table 8. Cluster-specific SNPs with inclusion probability >0.80 in the UK Biobank and FinnGen.

| Cluster  | Number of overlapping SNPs | Number of SNPs in UK Biobank cluster only | Number of SNPs in FinnGen cluster only | Overlapping SNPs                                                                                                                                    | SNPs in UK Biobank cluster only                                                                                                                                                                                                                                              | SNPs in FinnGen cluster only                                              |
|----------|----------------------------|-------------------------------------------|----------------------------------------|-----------------------------------------------------------------------------------------------------------------------------------------------------|------------------------------------------------------------------------------------------------------------------------------------------------------------------------------------------------------------------------------------------------------------------------------|---------------------------------------------------------------------------|
| Cluster1 | 3                          | 2                                         | 3                                      | rs1497406: rs1896995:<br>rs9297994                                                                                                                  | rs2257885: rs2617801                                                                                                                                                                                                                                                         | rs13108218: rs17580:<br>rs352942                                          |
| Cluster2 | 4                          | 12                                        | 6                                      | rs11167778: rs2519093:<br>rs3010275: rs67890964                                                                                                     | rs11621792: rs11670740:<br>rs12533280: rs13108218:<br>rs13379043: rs17580: rs1801689:<br>rs2642438: rs440677: rs7300192:<br>rs7904973: rs9837622                                                                                                                             | rs10272002: rs114165349:<br>rs1423527: rs2125345:<br>rs2617801: rs4671050 |
| Cluster3 | 11                         | 21                                        | 1                                      | rs10455872:<br>rs113330691:<br>rs12691088: rs35271870:<br>rs35358959: rs41289514:<br>rs531660643:<br>rs62119267: rs62122481:<br>rs693668: rs9987289 | rs11206517: rs11591147:<br>rs11601507: rs117733303:<br>rs11787335: rs12208357:<br>rs12603290: rs12657266:<br>rs13076933: rs17050272:<br>rs17217098: rs1808664:<br>rs247617: rs34042070:<br>rs34707604: rs553427: rs6689:<br>rs71311871: rs73015007:<br>rs77542162: rs9399137 | rs72631343                                                                |

|          |   |   |    |                                                |             |                                                                                                                                                                                                                      |
|----------|---|---|----|------------------------------------------------|-------------|----------------------------------------------------------------------------------------------------------------------------------------------------------------------------------------------------------------------|
| Cluster4 | 4 | 1 | 17 | rs10903129: rs174547:<br>rs2618566: rs28601761 | rs55714927  | rs1057868: rs11673465:<br>rs1169288: rs12445804:<br>rs12917376: rs138204164:<br>rs1556857: rs2391159:<br>rs267733: rs2706381:<br>rs35081008: rs4390169:<br>rs5752963: rs603424:<br>rs6792725: rs799157:<br>rs9496567 |
| Cluster5 | 3 | 1 | 1  | rs12968116: rs1800961:<br>rs6741740            | rs185263492 | rs2374569                                                                                                                                                                                                            |

---

Supplemental Table 9. KEGG and Reactome pathways related to the mapped genes for cluster-specific variants predicting plasma LDL-cholesterol (inclusion probability >0.80).

| Biobank | Cluster  | Category | Pathway                                              | Number of genes of the pathway | Number of input genes overlapping with genes of the pathway | Input genes overlapping with genes of the pathway                                                          | <i>P</i> value | Adjusted <i>p</i> value |
|---------|----------|----------|------------------------------------------------------|--------------------------------|-------------------------------------------------------------|------------------------------------------------------------------------------------------------------------|----------------|-------------------------|
| FinnGen | Cluster2 | KEGG     | Glycosphingolipid biosynthesis globo series          | 14                             | 3                                                           | <i>FUT2:FUT1:GBGT1</i>                                                                                     | 3.0E-05        | 5.5E-03                 |
| FinnGen | Cluster3 | KEGG     | ABC transporters                                     | 42                             | 4                                                           | <i>ABCA9:ABCA6:ABCA10:ABCA5</i>                                                                            | 3.1E-06        | 5.7E-04                 |
| FinnGen | Cluster3 | Reactome | Transport of small molecules                         | 721                            | 14                                                          | <i>BSND:PCSK9:PSMA5:ABCA9:A<br/>BCA6:ABCA10:ABCA5:APOE:A<br/>POC1:APOC4:APOC2:SLC22A2<br/>:SLC22A3:LPA</i> | 8.0E-10        | 1.2E-06                 |
| FinnGen | Cluster3 | Reactome | Plasma lipoprotein assembly remodeling and clearance | 71                             | 6                                                           | <i>PCSK9:APOE:APOC1:APOC4:A<br/>POC2:LPA</i>                                                               | 1.7E-08        | 1.3E-05                 |
| FinnGen | Cluster3 | Reactome | ABC transporters in lipid homeostasis                | 18                             | 4                                                           | <i>ABCA9:ABCA6:ABCA10:ABCA5</i>                                                                            | 8.7E-08        | 4.1E-05                 |
| FinnGen | Cluster3 | Reactome | Plasma lipoprotein assembly                          | 19                             | 4                                                           | <i>APOE:APOC1:APOC4:APOC2</i>                                                                              | 1.1E-07        | 4.1E-05                 |
| FinnGen | Cluster3 | Reactome | Plasma lipoprotein clearance                         | 33                             | 4                                                           | <i>PCSK9:APOE:APOC1:APOC4</i>                                                                              | 1.1E-06        | 3.4E-04                 |

|            |          |          |                                                      |    |   |                                              |         |         |
|------------|----------|----------|------------------------------------------------------|----|---|----------------------------------------------|---------|---------|
| FinnGen    | Cluster3 | Reactome | ABC family proteins mediated transport               | 99 | 5 | <i>PSMA5:ABCA9:ABCA6:ABCA10:ABCA5</i>        | 3.9E-06 | 9.7E-04 |
| FinnGen    | Cluster3 | Reactome | Abacavir transmembrane transport                     | 5  | 2 | <i>SLC22A2:SLC22A3</i>                       | 5.6E-05 | 1.0E-02 |
| FinnGen    | Cluster3 | Reactome | VLDL assembly                                        | 5  | 2 | <i>APOC1:APOC4</i>                           | 5.6E-05 | 1.0E-02 |
| FinnGen    | Cluster3 | Reactome | Plasma lipoprotein remodeling                        | 32 | 3 | <i>APOE:APOC2:LPA</i>                        | 6.1E-05 | 1.0E-02 |
| FinnGen    | Cluster3 | Reactome | VLDL clearance                                       | 6  | 2 | <i>APOC1:APOC4</i>                           | 8.4E-05 | 1.3E-02 |
| FinnGen    | Cluster3 | Reactome | Abacavir transport and metabolism                    | 10 | 2 | <i>SLC22A2:SLC22A3</i>                       | 2.5E-04 | 2.5E-02 |
| FinnGen    | Cluster3 | Reactome | Organic cation transport                             | 10 | 2 | <i>SLC22A2:SLC22A3</i>                       | 2.5E-04 | 2.5E-02 |
| FinnGen    | Cluster3 | Reactome | Chylomicron assembly                                 | 10 | 2 | <i>APOE:APOC2</i>                            | 2.5E-04 | 2.5E-02 |
| FinnGen    | Cluster3 | Reactome | Chylomicron remodeling                               | 10 | 2 | <i>APOE:APOC2</i>                            | 2.5E-04 | 2.5E-02 |
| FinnGen    | Cluster3 | Reactome | HDL remodeling                                       | 10 | 2 | <i>APOE:APOC2</i>                            | 2.5E-04 | 2.5E-02 |
| UK Biobank | Cluster3 | Reactome | Plasma lipoprotein assembly remodeling and clearance | 71 | 7 | <i>PCSK9:CETP:APOE:APOC1:APOC4:APOC2:LPA</i> | 2.3E-06 | 3.5E-03 |
| UK Biobank | Cluster3 | Reactome | Abacavir transmembrane transport                     | 5  | 3 | <i>SLC22A1:SLC22A2:SLC22A3</i>               | 5.9E-06 | 4.4E-03 |

|               |          |          |                                                      |     |    |                                                                                                                                  |         |         |
|---------------|----------|----------|------------------------------------------------------|-----|----|----------------------------------------------------------------------------------------------------------------------------------|---------|---------|
| UK Biobank    | Cluster3 | Reactome | Transport of small molecules                         | 721 | 19 | <i>BSND:PCSK9:PSMA5:SLC12A3:CETP:ABCA9:ABCA6:ABCA10:ABCA5:SLC44A2:ATP13A1:APOE:APOC1:APOC4:APOC2:SLC22A1:SLC22A2:SLC22A3:LPA</i> | 1.2E-05 | 5.2E-03 |
| UK Biobank    | Cluster3 | Reactome | ABC transporters in lipid homeostasis                | 18  | 4  | <i>ABCA9:ABCA6:ABCA10:ABCA5</i>                                                                                                  | 1.4E-05 | 5.2E-03 |
| UK Biobank    | Cluster3 | Reactome | Plasma lipoprotein assembly                          | 19  | 4  | <i>APOE:APOC1:APOC4:APOC2</i>                                                                                                    | 1.7E-05 | 5.2E-03 |
| UK Biobank    | Cluster3 | Reactome | Abacavir transport and metabolism                    | 10  | 3  | <i>SLC22A1:SLC22A2:SLC22A3</i>                                                                                                   | 6.8E-05 | 1.3E-02 |
| UK Biobank    | Cluster3 | Reactome | Organic cation transport                             | 10  | 3  | <i>SLC22A1:SLC22A2:SLC22A3</i>                                                                                                   | 6.8E-05 | 1.3E-02 |
| UK Biobank    | Cluster3 | Reactome | HDL remodeling                                       | 10  | 3  | <i>CETP:APOE:APOC2</i>                                                                                                           | 6.8E-05 | 1.3E-02 |
| UK Biobank    | Cluster3 | Reactome | Plasma lipoprotein remodeling                        | 32  | 4  | <i>CETP:APOE:APOC2:LPA</i>                                                                                                       | 1.5E-04 | 2.5E-02 |
| UK Biobank    | Cluster3 | Reactome | Plasma lipoprotein clearance                         | 33  | 4  | <i>PCSK9:APOE:APOC1:APOC4</i>                                                                                                    | 1.7E-04 | 2.5E-02 |
| UK Biobank    | Cluster3 | Reactome | Organic cation anion zwitterion transport            | 15  | 3  | <i>SLC22A1:SLC22A2:SLC22A3</i>                                                                                                   | 2.5E-04 | 3.4E-02 |
| Biobank Japan | Cluster2 | Reactome | Plasma lipoprotein assembly remodeling and clearance | 71  | 10 | <i>PCSK9:LDLR:C19orf80:APOE:APOC1:APOC4:APOC2:APOB:LP A:ABCA1</i>                                                                | 1.2E-10 | 1.8E-07 |

|               |          |          |                                                  |     |    |                                                                                                                          |         |         |
|---------------|----------|----------|--------------------------------------------------|-----|----|--------------------------------------------------------------------------------------------------------------------------|---------|---------|
| Biobank Japan | Cluster2 | Reactome | Plasma lipoprotein assembly                      | 19  | 6  | <i>APOE:APOC1:APOC4:APOC2:APOB:ABCA1</i>                                                                                 | 3.9E-09 | 2.9E-06 |
| Biobank Japan | Cluster2 | Reactome | Plasma lipoprotein clearance                     | 33  | 6  | <i>PCSK9:LDLR:APOE:APOC1:APOC4:APOB</i>                                                                                  | 1.5E-07 | 7.3E-05 |
| Biobank Japan | Cluster2 | Reactome | Transport of small molecules                     | 721 | 19 | <i>BSND:PCSK9:MICU1:MCU:BES T1:FTH1:SLC44A2:LDLR:C19orf80:APOE:APOC1:APOC4:APOC2:APOB:ADD1:SLC22A3:LPA:ABCA1:SLC44A1</i> | 1.8E-06 | 6.8E-04 |
| Biobank Japan | Cluster2 | Reactome | Plasma lipoprotein remodeling                    | 32  | 5  | <i>C19orf80:APOE:APOC2:APOB:LPA</i>                                                                                      | 3.7E-06 | 8.6E-04 |
| Biobank Japan | Cluster2 | Reactome | VLDL assembly                                    | 5   | 3  | <i>APOC1:APOC4:APOB</i>                                                                                                  | 4.0E-06 | 8.6E-04 |
| Biobank Japan | Cluster2 | Reactome | Chylomicron clearance                            | 5   | 3  | <i>LDLR:APOE:APOB</i>                                                                                                    | 4.0E-06 | 8.6E-04 |
| Biobank Japan | Cluster2 | Reactome | VLDL clearance                                   | 6   | 3  | <i>APOC1:APOC4:APOB</i>                                                                                                  | 8.0E-06 | 1.5E-03 |
| Biobank Japan | Cluster2 | Reactome | Chylomicron assembly                             | 10  | 3  | <i>APOE:APOC2:APOB</i>                                                                                                   | 4.7E-05 | 7.1E-03 |
| Biobank Japan | Cluster2 | Reactome | Chylomicron remodeling                           | 10  | 3  | <i>APOE:APOC2:APOB</i>                                                                                                   | 4.7E-05 | 7.1E-03 |
| Biobank Japan | Cluster2 | Reactome | Visual phototransduction                         | 99  | 6  | <i>GRK1:LDLR:APOE:APOC2:APOB:GRK4</i>                                                                                    | 9.9E-05 | 1.4E-02 |
| Biobank Japan | Cluster2 | Reactome | Regulation of IGF transport and uptake by IGFBPs | 123 | 6  | <i>PCSK9:TMEM132A:GAS6:APOE:APOB:PLG</i>                                                                                 | 3.2E-04 | 3.9E-02 |

|               |          |          |                                       |    |   |                             |         |         |
|---------------|----------|----------|---------------------------------------|----|---|-----------------------------|---------|---------|
| Biobank Japan | Cluster2 | Reactome | Scavenging by class A<br>receptors    | 19 | 3 | <i>FTH1:APOE:APOB</i>       | 3.6E-04 | 3.9E-02 |
| Biobank Japan | Cluster2 | Reactome | LDL clearance                         | 19 | 3 | <i>PCSK9:LDLR:APOB</i>      | 3.6E-04 | 3.9E-02 |
| Biobank Japan | Cluster2 | Reactome | Metabolism of fat<br>soluble vitamins | 47 | 4 | <i>LDLR:APOE:APOC2:APOB</i> | 4.2E-04 | 4.1E-02 |

---

ABC, adenosine triphosphate (ATP)-binding cassette transporters; HDL, high-density lipoprotein; IGF, insulin-like growth factor; IGFbps, insulin-like growth factor-binding proteins; LDL, low-density lipoprotein; VLDL, very-low-density lipoprotein.
